# Supplementary material
Source: PubMed Central journal article supplement (PMC5567863)
Supplement: NIHMS894922-supplement-s1.pdf [file NIHMS894922-supplement-s1.pdf]

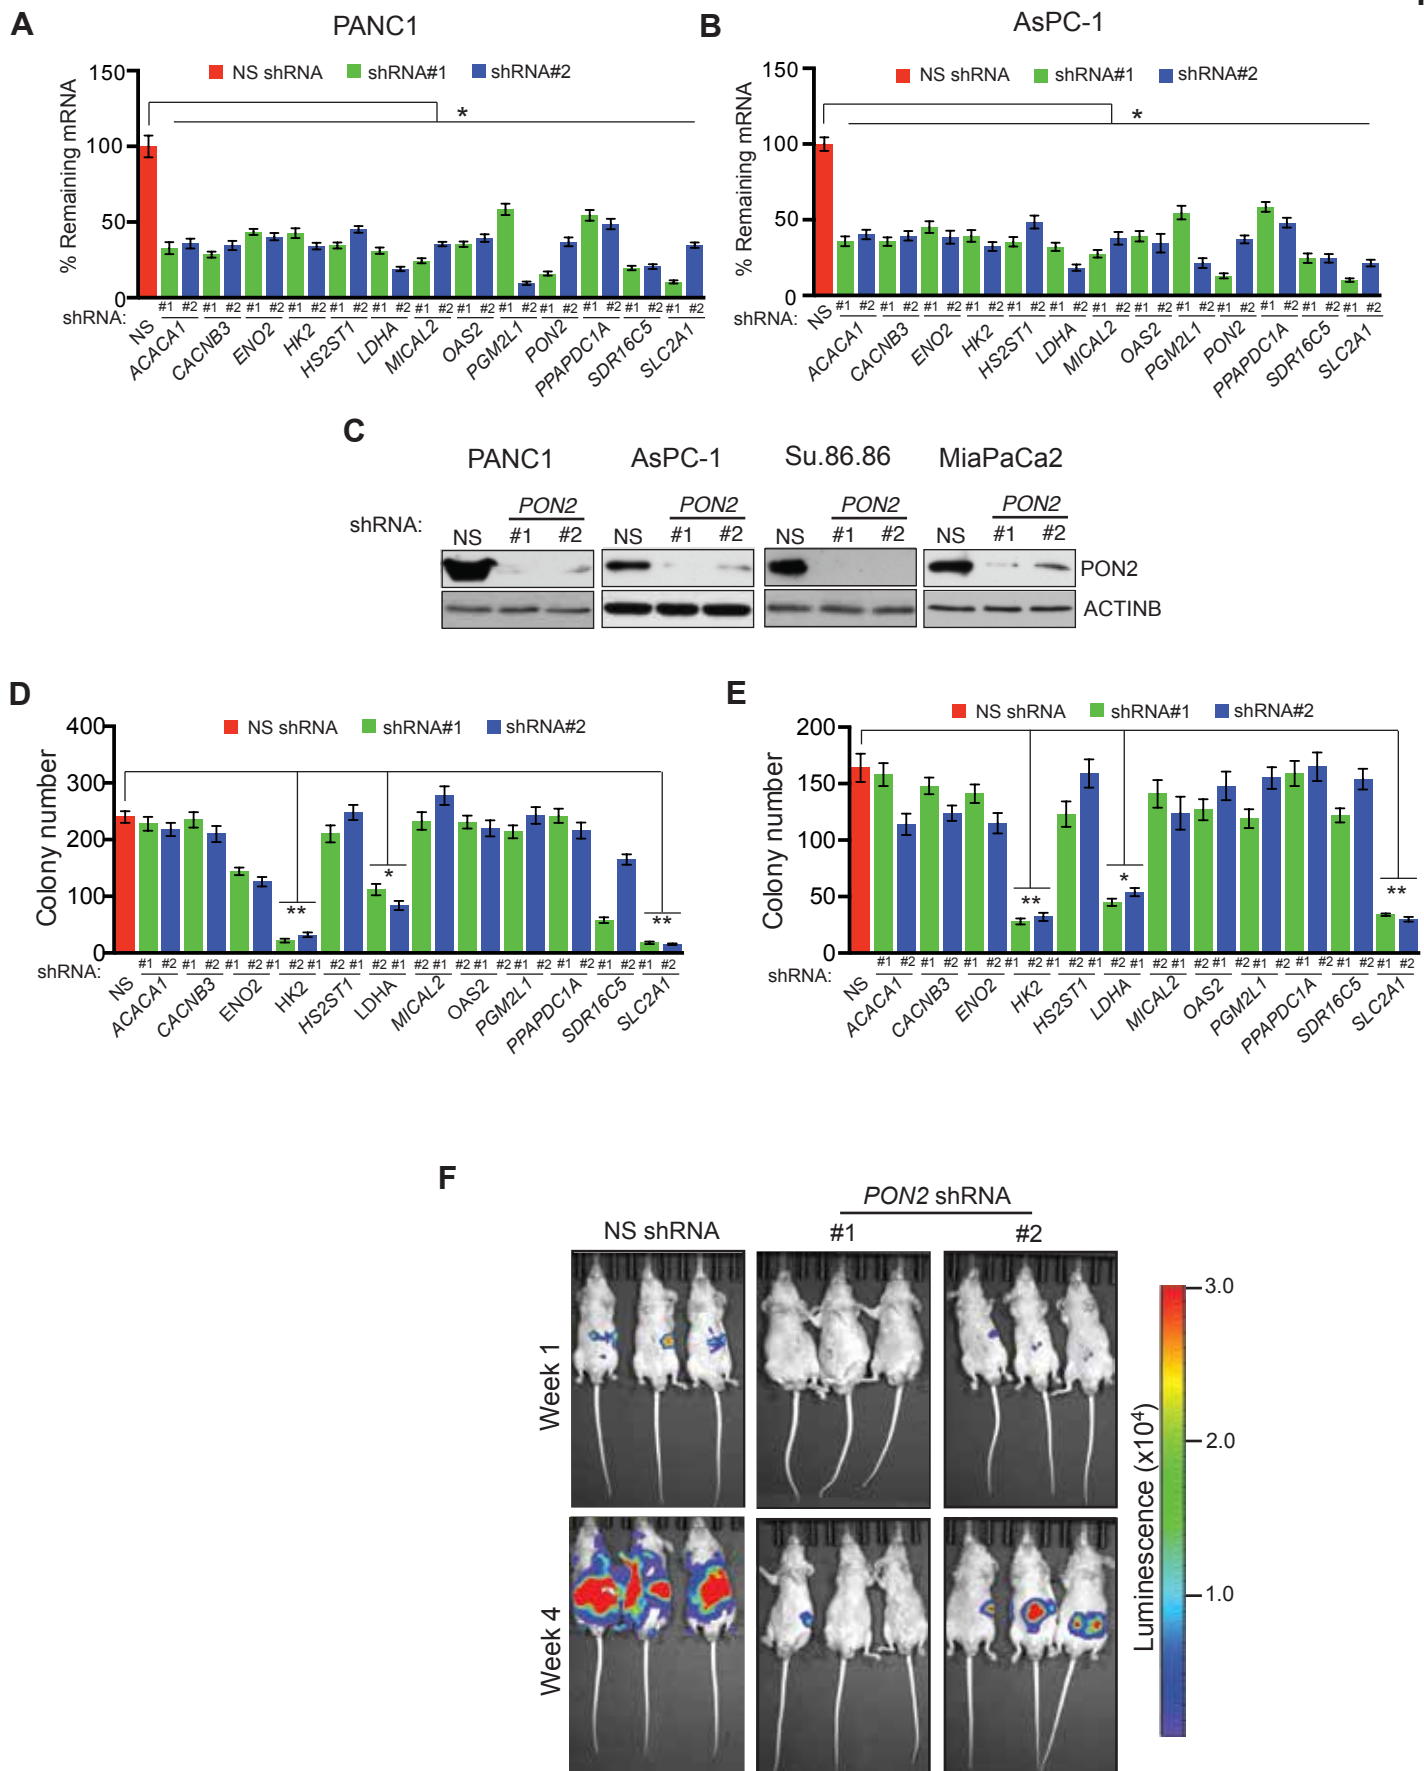

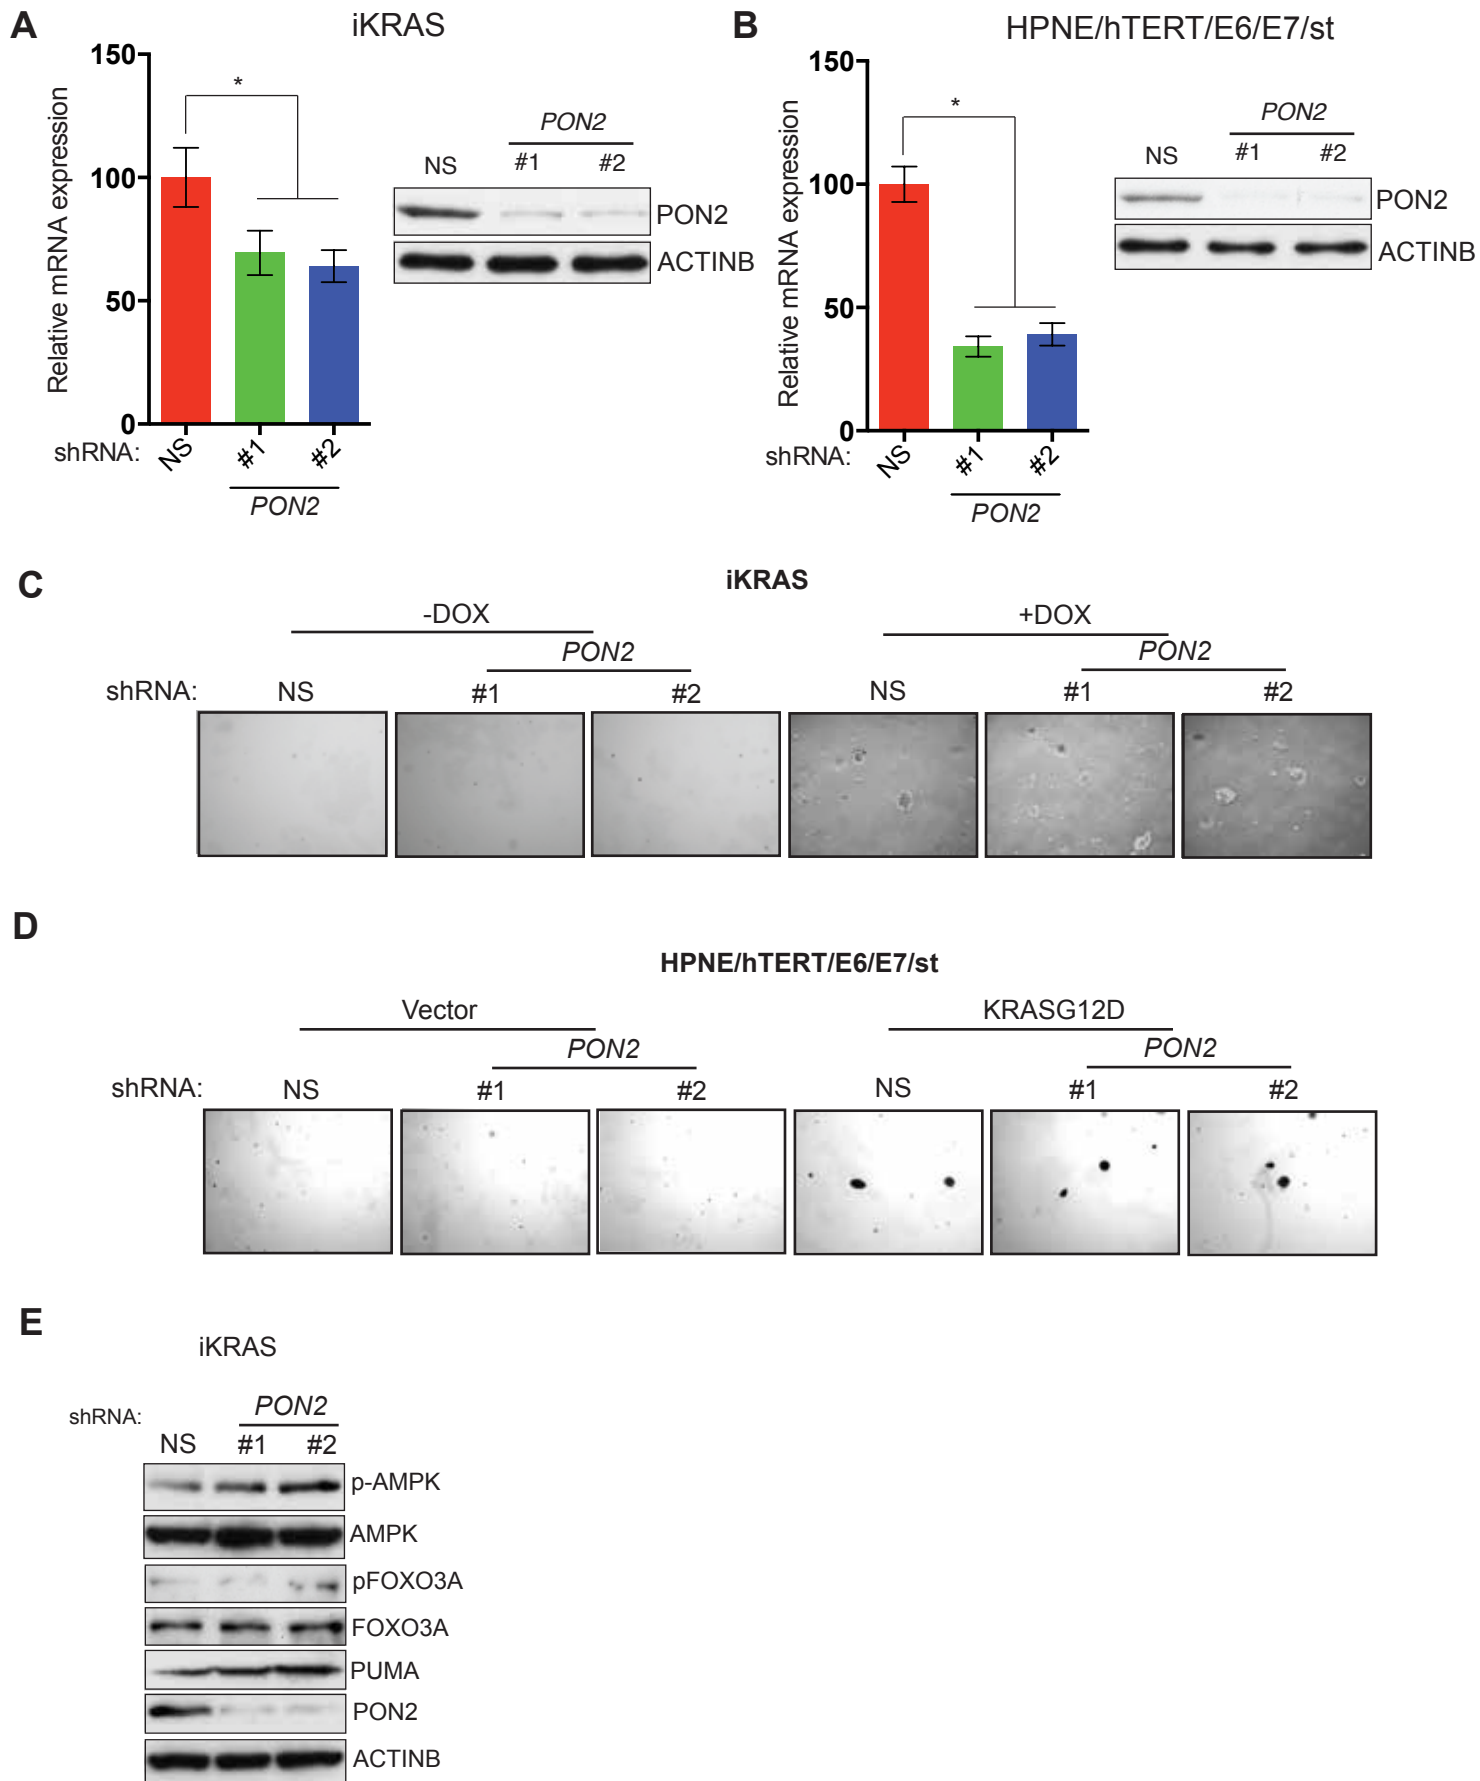

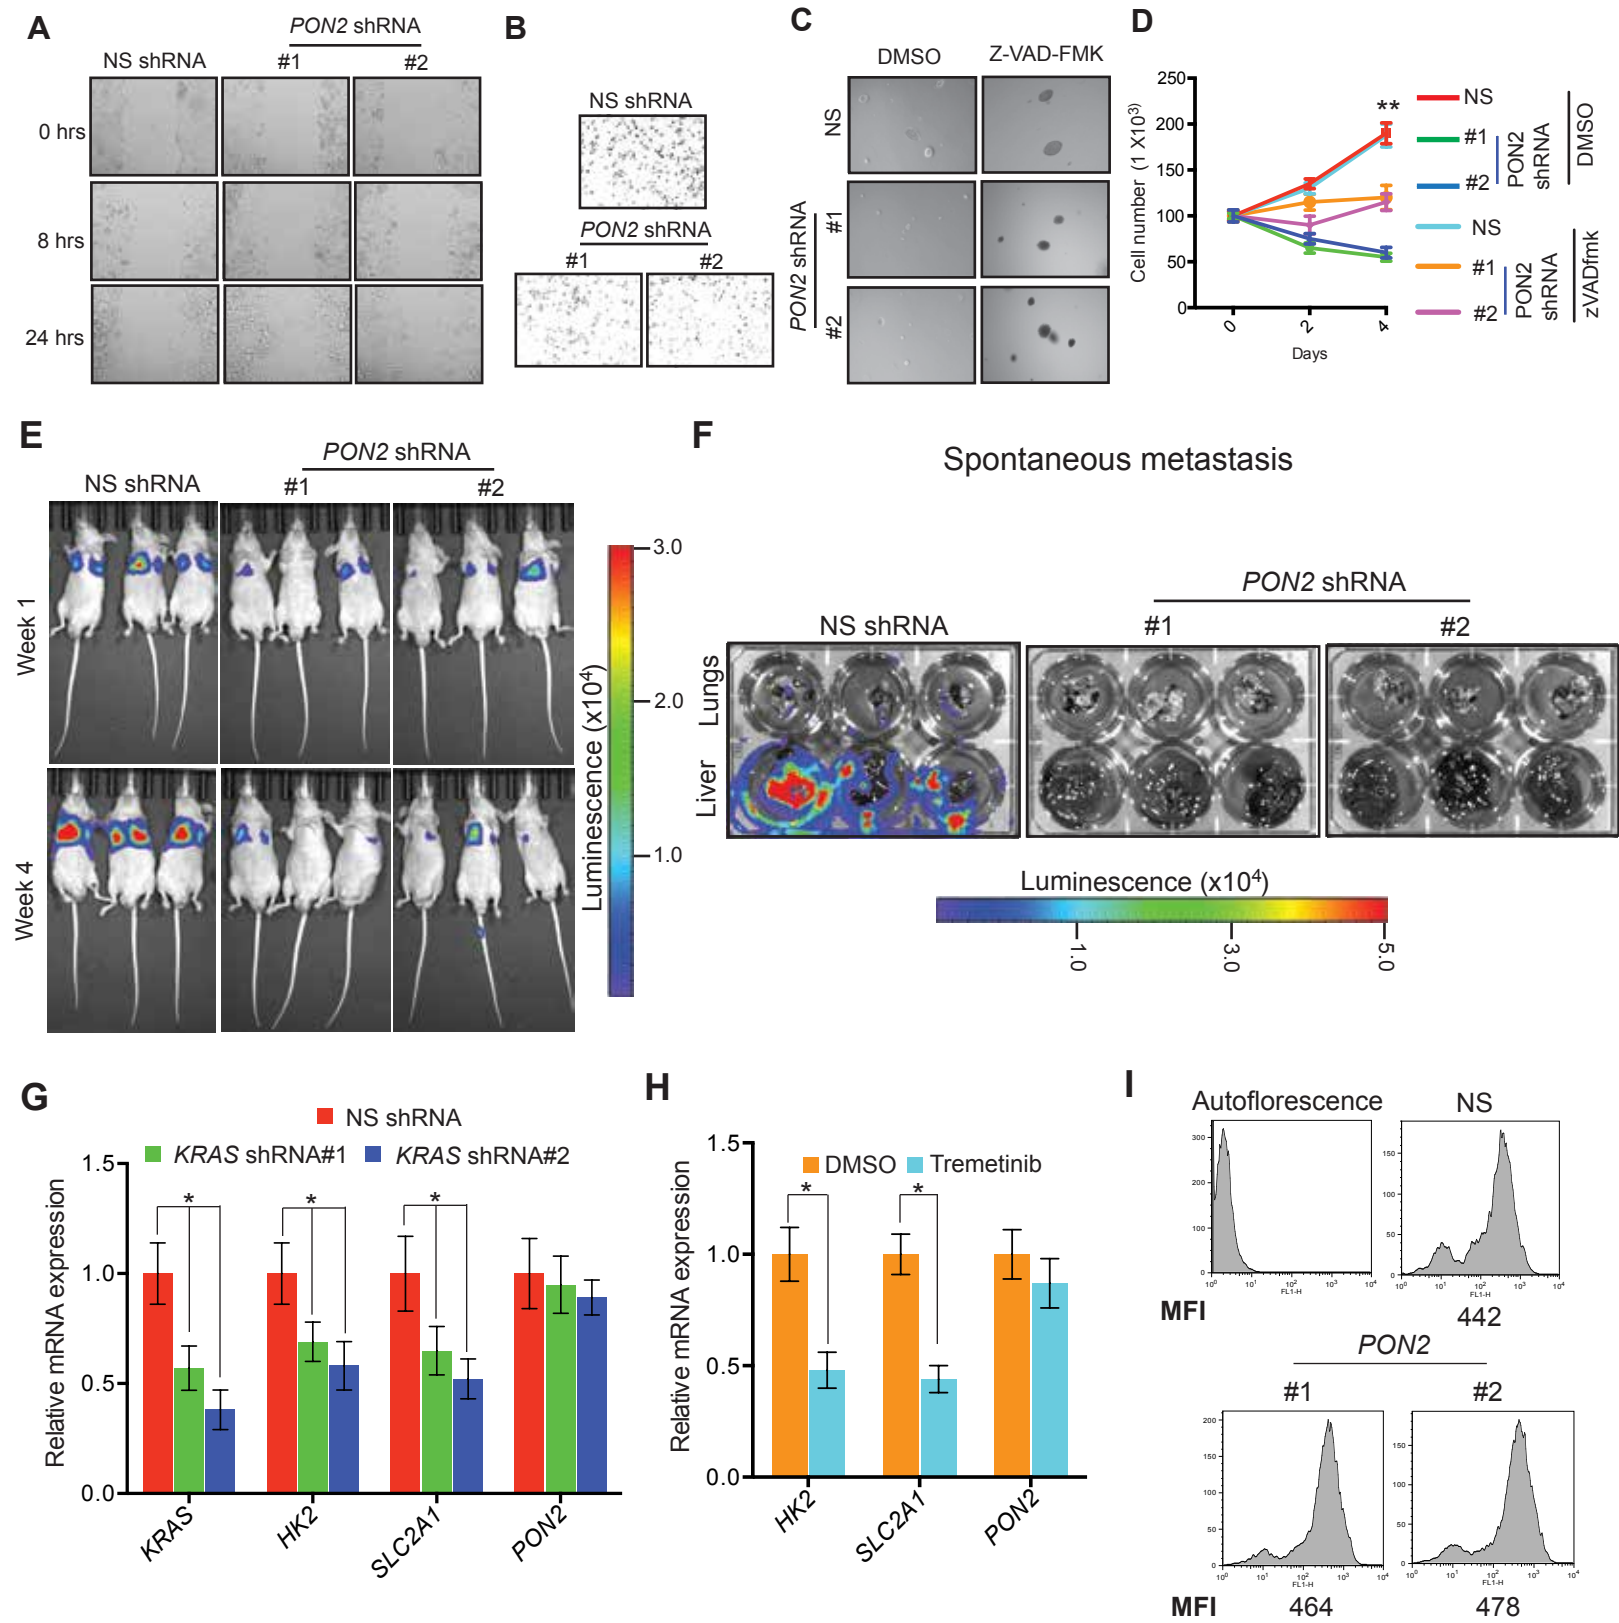

**A**

PANC1

AsPC1

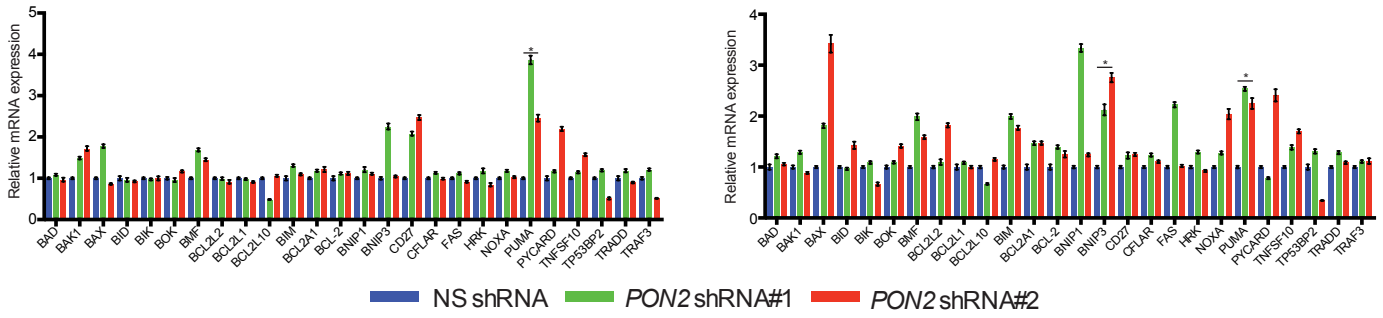

■ NS shRNA ■ PON2 shRNA#1 ■ PON2 shRNA#2

**B**

PANC1

AsPC1

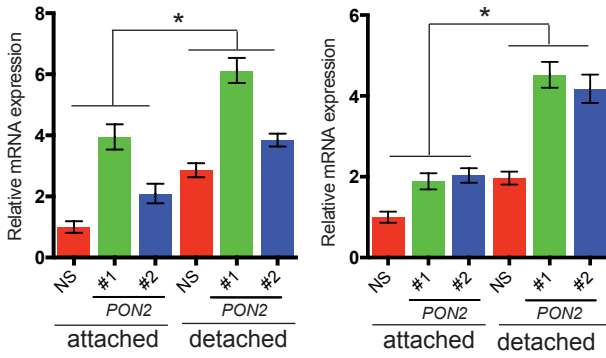

**C**

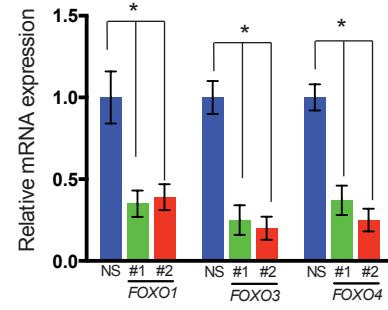

**D**

PANC1

AsPC1

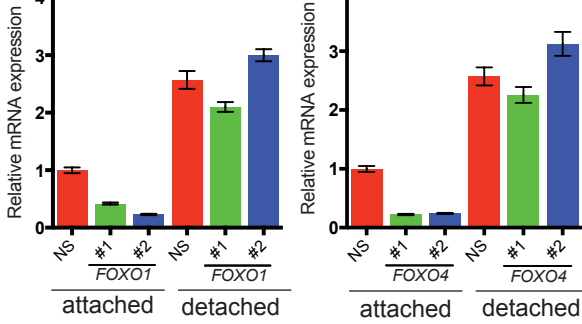

**E** Attached Detached

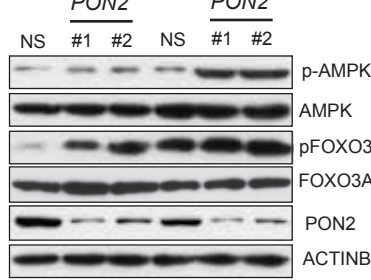

**F**

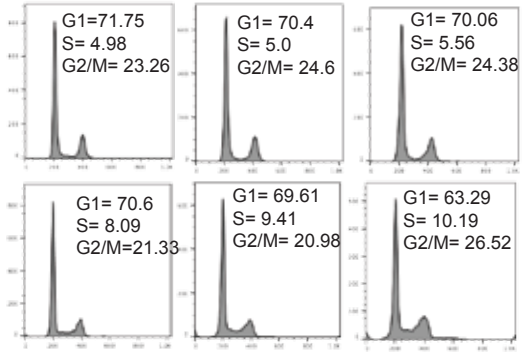

**G**

PANC1

AsPC1

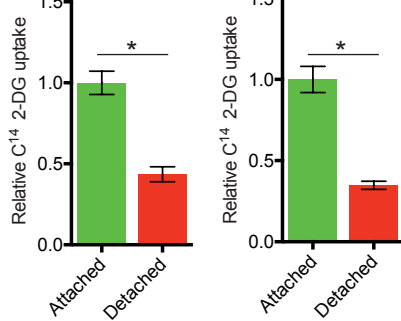

**H**

PANC1

AsPC1

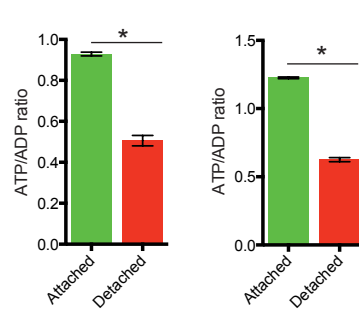

**I**

PANC1

AsPC1

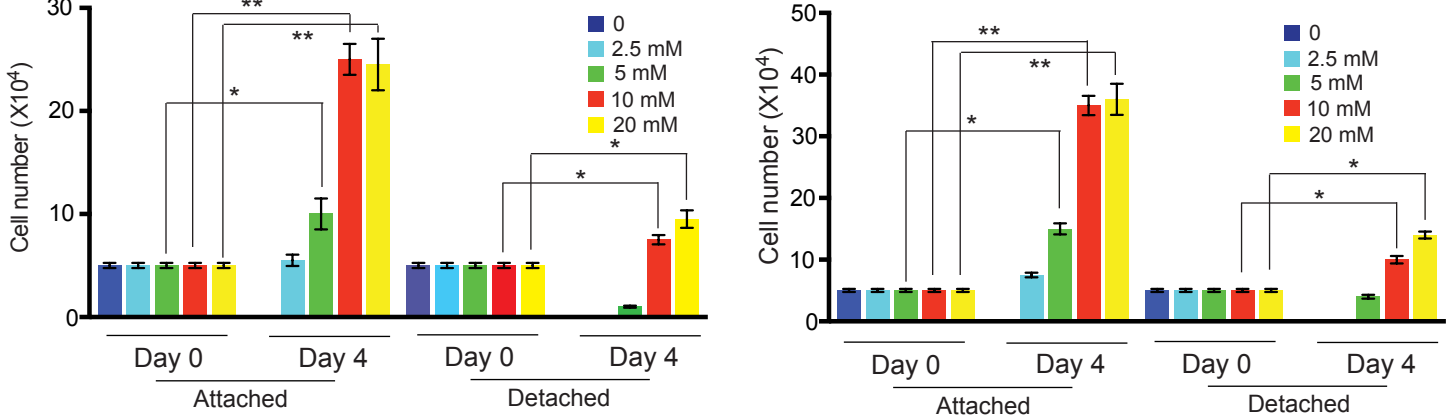

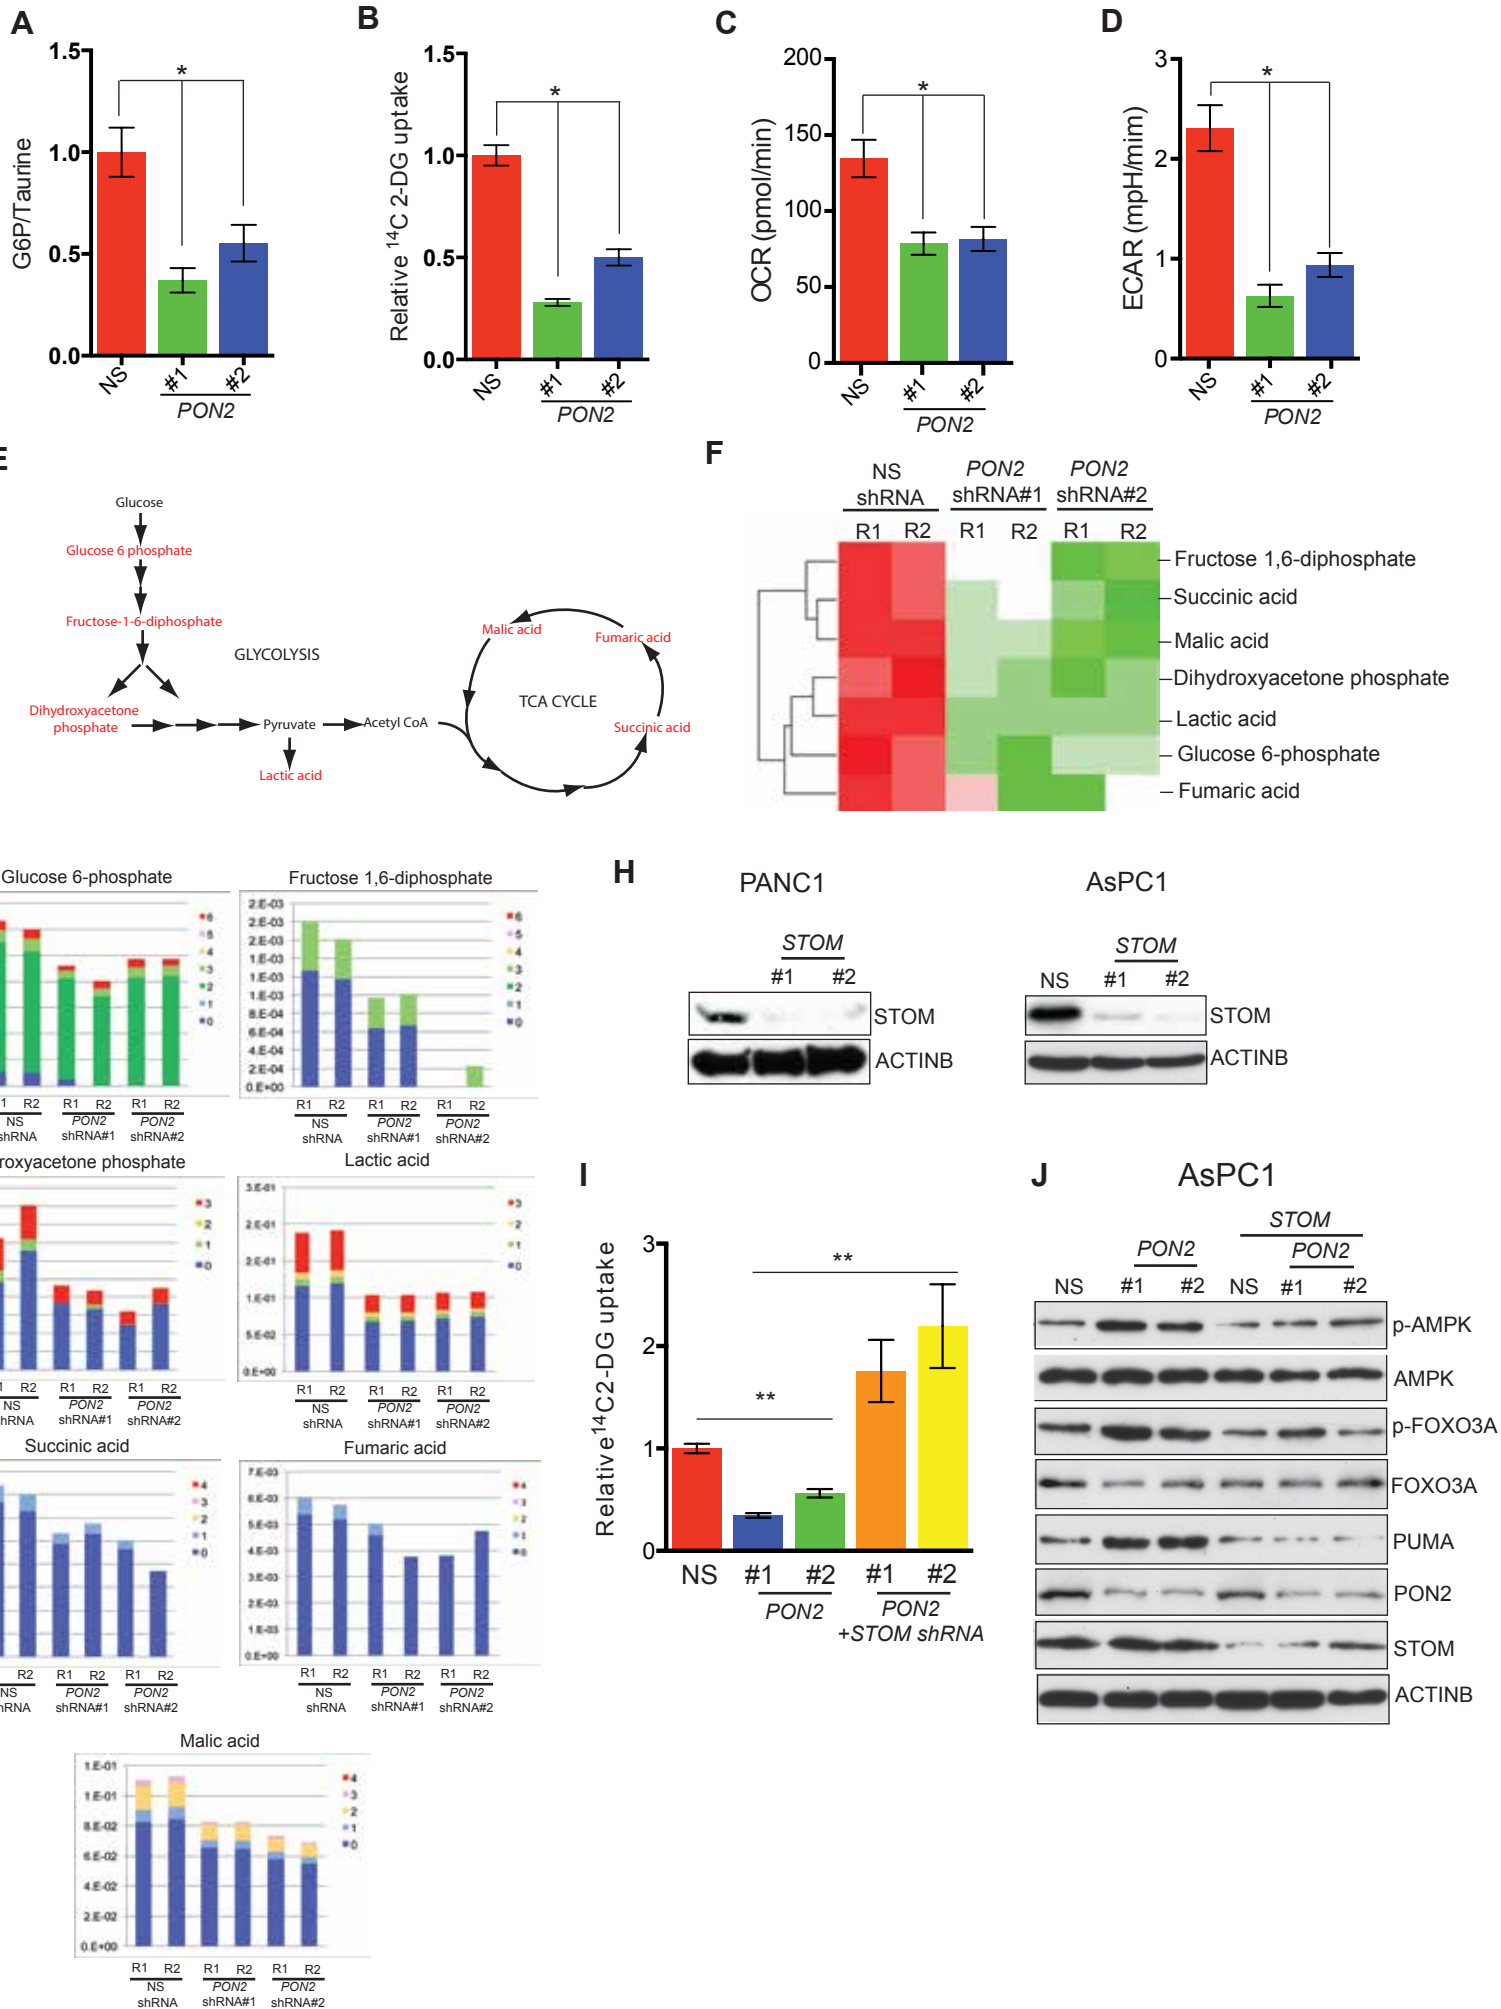

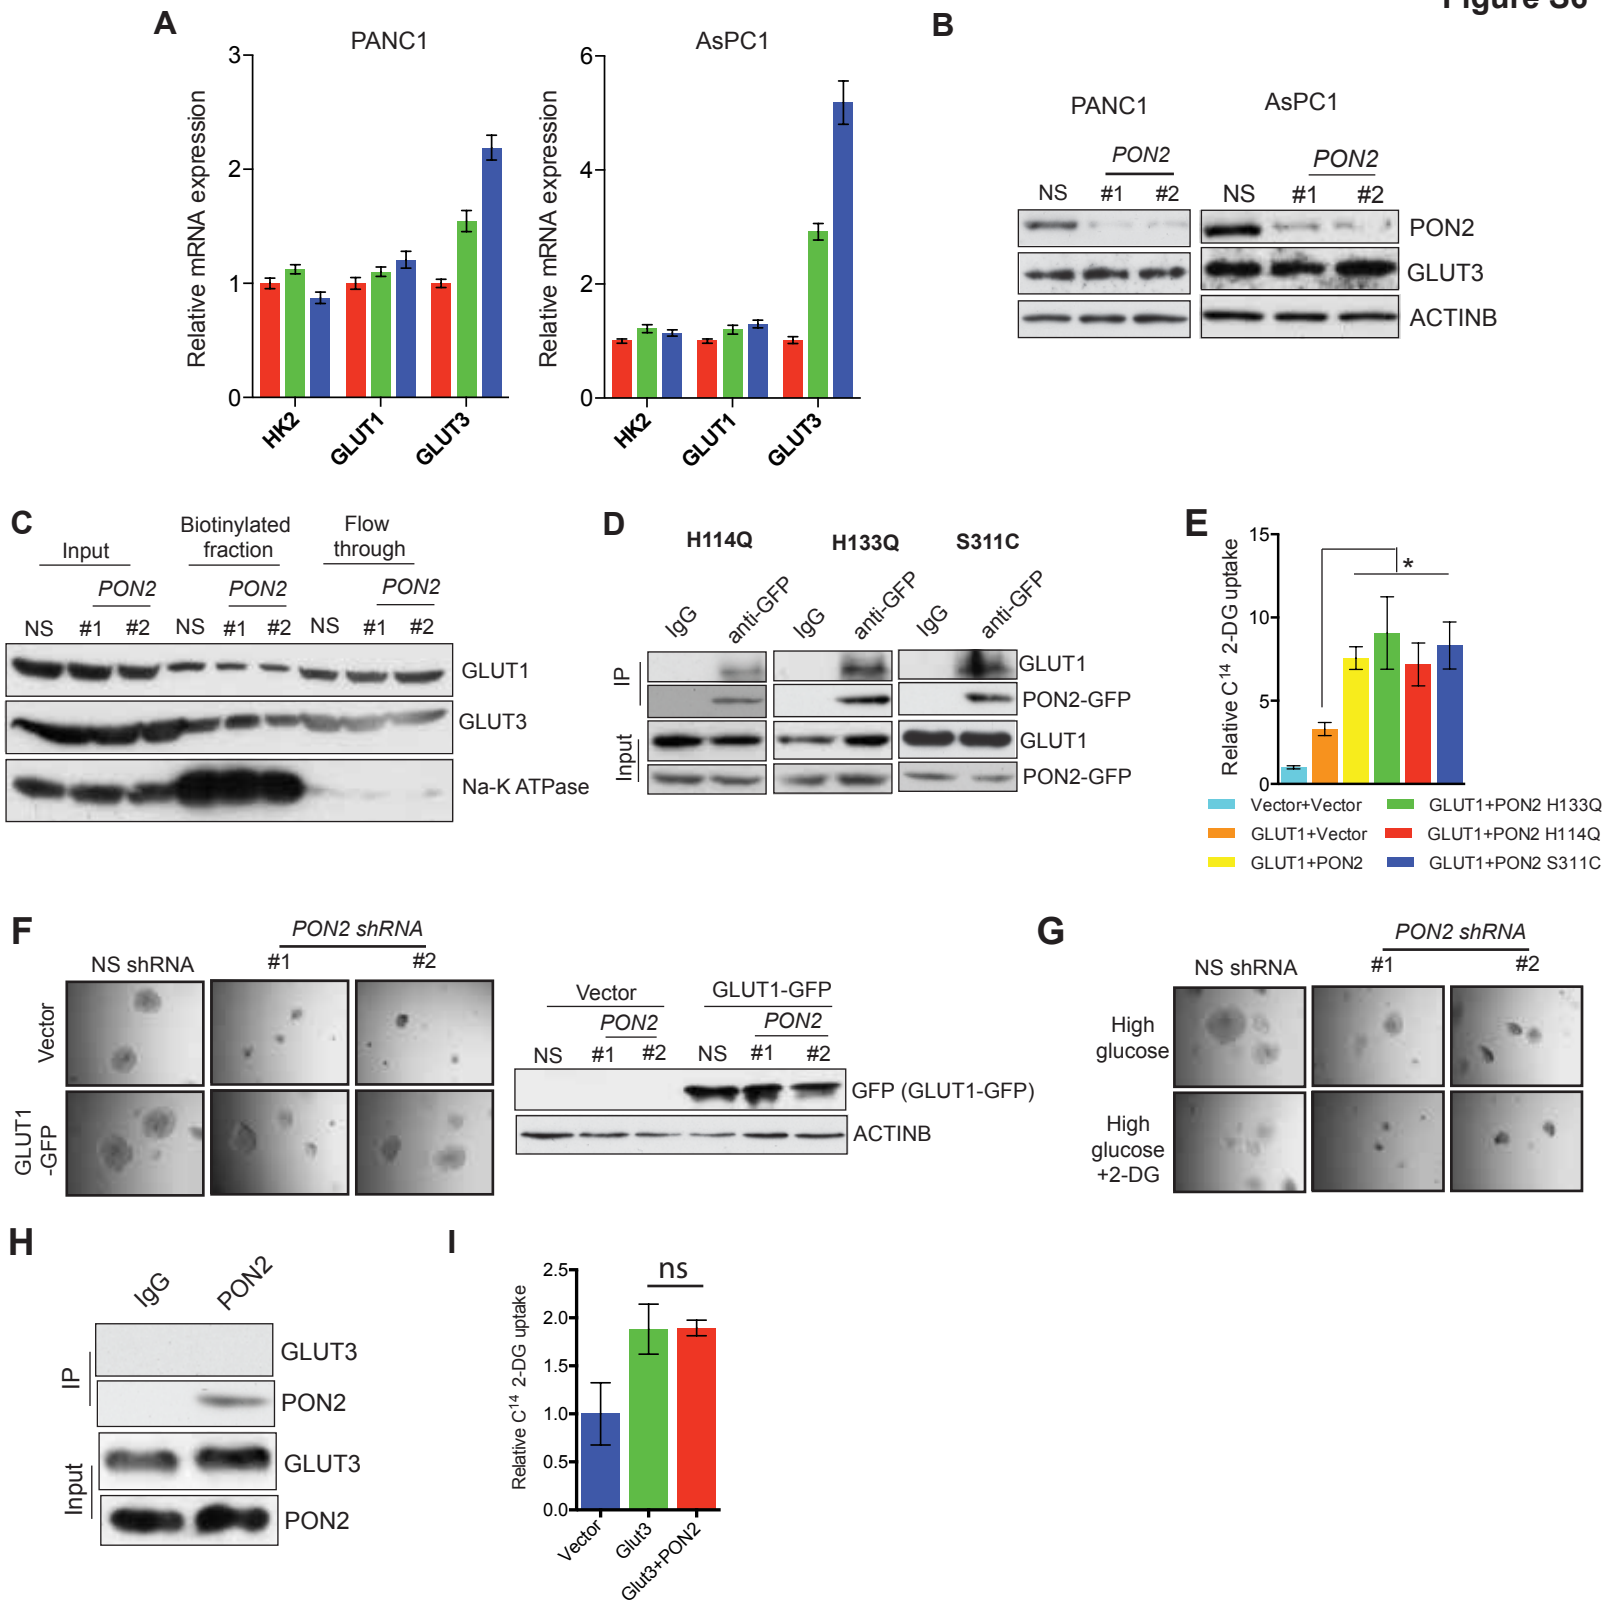

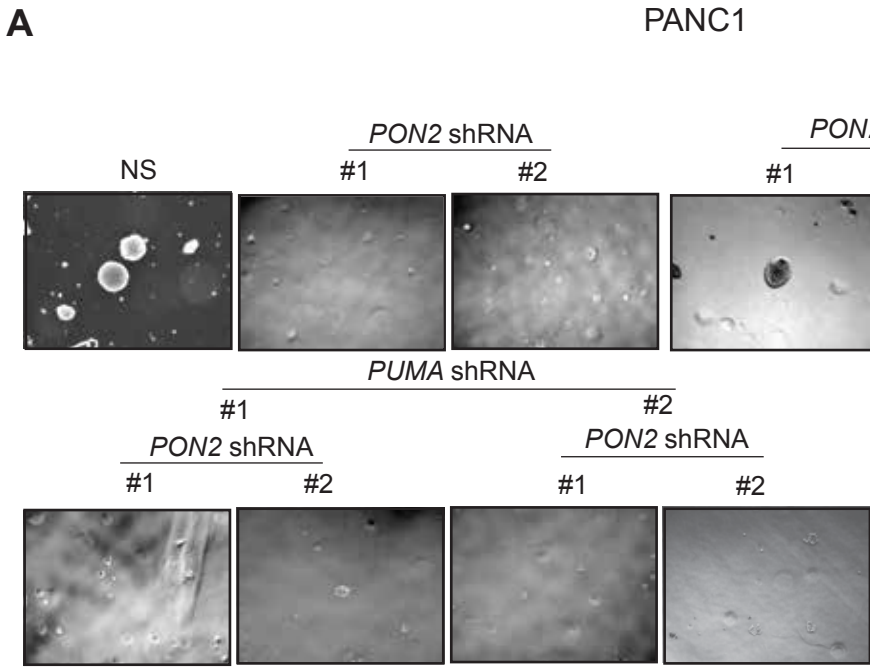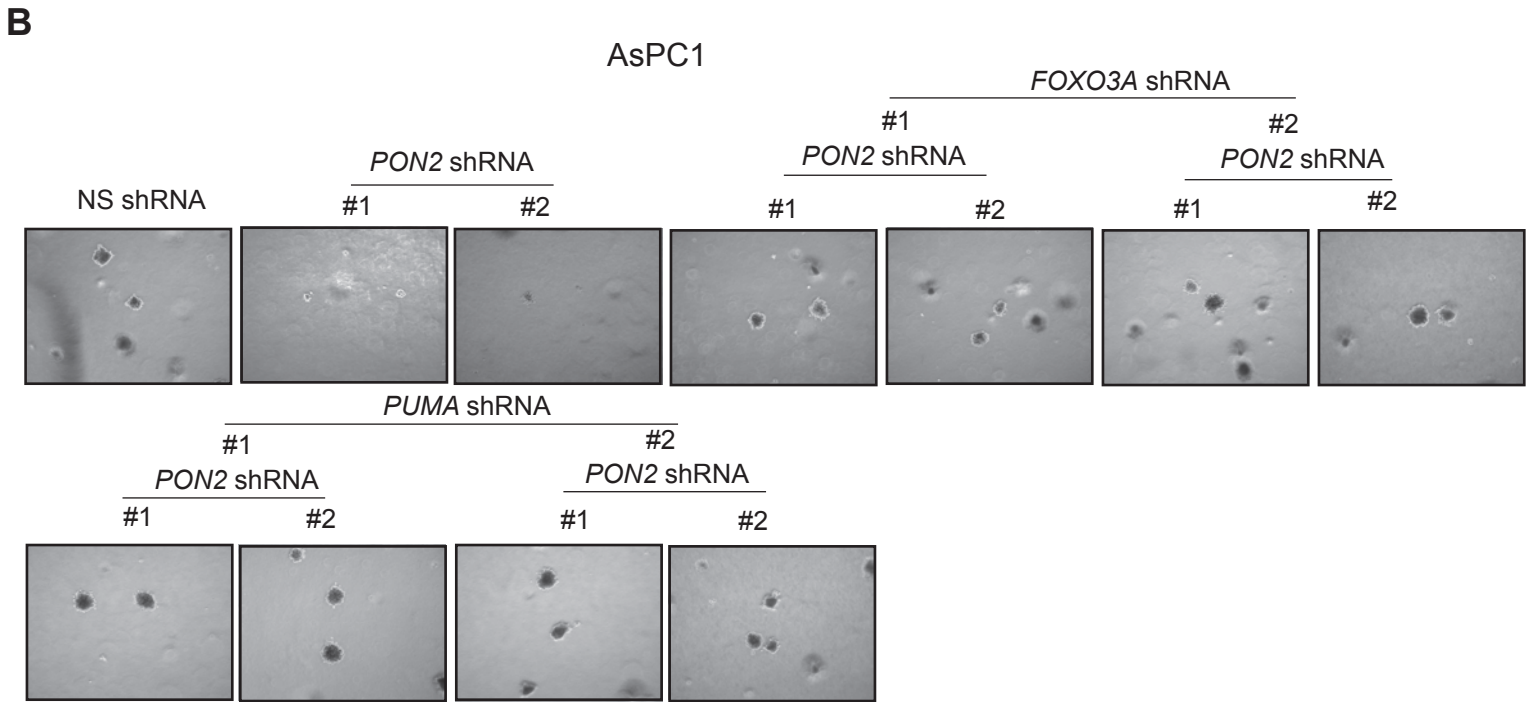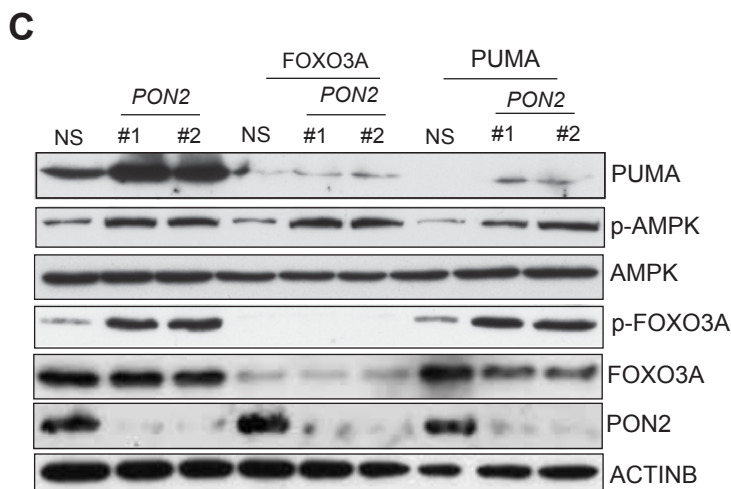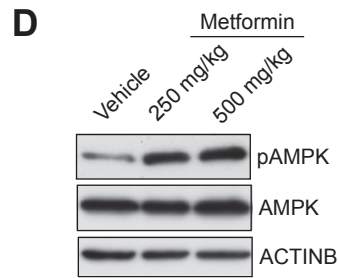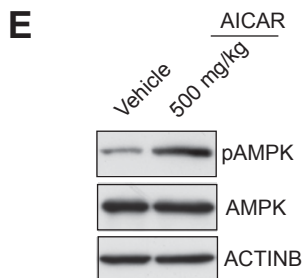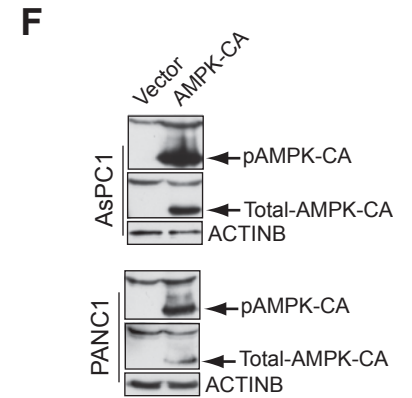

## SUPPLEMENTARY INFORMATION

### SUPPLEMENTARY FIGURE LEGENDS

#### **Figure S1. Related to Figure 1. *PON2* knockdown inhibits PDAC tumor growth**

**A.** PANC1 cells expressing the indicated shRNAs were analyzed by RT-qPCR. The remaining mRNA expression (%) in reference to cells expressing nonspecific (NS) shRNA is shown. **B.** AsPC1 cells expressing the indicated shRNAs were analyzed by RT-qPCR. The remaining gene expression (%) in reference to cells expressing NS shRNA is shown. **C.** PDAC cell lines expressing *PON2* or NS shRNAs were analyzed for *PON2* protein by immunoblotting, with ACTINB as a loading control. **D.** PANC1 cells expressing the indicated shRNAs were analyzed for their ability to grow in an anchorage-independent manner in soft agar. Number of colonies is shown. **E.** AsPC-1 cells expressing indicated shRNAs were analyzed for their ability to grow in an anchorage-independent manner in soft agar. Number of colonies is shown. **F.** AsPC-1 cells ( $1 \times 10^5$ ) expressing either *PON2* or NS shRNA were injected orthotopically into the pancreas of athymic nude mice (n=3), and tumor growth was monitored by bioluminescence imaging. Representative images at week 1 and week 4 are shown. Data are presented as mean  $\pm$  SEM, \*p<0.05, \*\*p<0.005.

#### **Figure S2. Related to Figure 1. *PON2* is not necessary for *KRAS*<sup>G12D</sup>-induced transformation**

**A.** Mouse iKRAS-derived cells expressing *Pon2* or nonspecific (NS) shRNA were analyzed for *Pon2* mRNA levels by RT-qPCR (left) and *Pon2* protein levels by immunoblotting (right). **B.** HPNE-hTERT E6/E7/st cells expressing *Pon2* or NS shRNAs



were analyzed for *Pon2* mRNA levels by RT-qPCR (left) or PON2 protein levels by immunoblotting (right). **C.** Mouse iKRAS-derived pancreatic cancer cells expressing *Pon2* or NS shRNAs were analyzed for their ability to grow in an anchorage-independent manner in soft agar assay with without doxycycline (no KRAS<sup>G12D</sup> activation) or doxycycline (KRAS<sup>G12D</sup> activation). Representative images are shown. **D.** HPNE-hTERT E6/E7/st cells expressing *PON2* or NS shRNA along with vector expressing KRAS<sup>G12D</sup> or empty vector were analyzed for their ability to grow in an anchorage-independent manner in soft agar. Representative images are shown. **E.** iKRAS cells expressing *PON2* or NS shRNA were analyzed for indicated proteins by immunoblot analysis. Data are presented as mean  $\pm$  SEM, \*p<0.05.

**Figure S3. Related to Figure 2. Loss of PON2 does not affect migratory or invasive phenotypes or cellular ROS levels in PDAC cells.** **A.** PANC1 cells expressing *PON2* or nonspecific (NS) shRNAs were analyzed for migration using the wound-healing assay. Representative images are shown. **B.** PANC1 cells expressing *PON2* or NS shRNAs were analyzed for invasion using Matrigel invasion chambers. Representative images are shown. **C.** PANC1 cells expressing *PON2* or NS shRNAs were treated with either DMSO or Z-VAD-FMK (10  $\mu$ M) and analyzed for anchorage independent growth using soft-agar. Representative wells for indicated conditions is presented. **D.** PDAC cell lines expressing *PON2* or nonspecific (NS) shRNAs were seeded on poly(HEMA)-coated plates and treated with either DMSO or Z-VAD-FMK (10  $\mu$ M). Viable cells were counted after staining with trypan blue, and the relative numbers of viable cells are plotted at indicated time. **E.** The tail veins of athymic nude mice (n=3) were injected with

PANC1 cells expressing *PON2* or NS shRNAs. Lung metastasis formation was measured by bioluminescence imaging. Representative images for week 1 and week 4 are shown. **F.** Luciferase-tagged AsPC-1 cells carrying *PON2* or NS shRNA were injected into the pancreas of athymic nude mice (n=3). Spontaneous metastasis to liver and lung was analyzed after 6 weeks. Bioluminescence images of the livers and lungs from the mice are shown. **G.** PANC1 cells expressing *KRAS* or NS shRNAs were analyzed for the mRNA expression of indicated genes by RT-qPCR. The relative mRNA expression levels of the indicated genes are shown. **H.** PANC1 cells were treated with 250 nM trametinib or DMSO (control) for 48 hours and analyzed by RT-qPCR. The relative mRNA expression levels of the indicated genes are shown. **I.** PANC1 cells expressing *PON2* or NS shRNAs were analyzed for cellular ROS levels by staining with H2DCFDA followed by fluorescence-activated cell sorting. Representative histograms and mean fluorescent intensities are shown. Data are presented as mean  $\pm$  SEM, \*p<0.05, \*\*p<0.005.

**Figure S4. Related to Figure 4. PON2 loss results in PUMA upregulation in a FOXO3A-dependent manner.** **A.** PANC1 (left) or AsPC-1 (right) cells expressing *PON2* or nonspecific (NS) shRNAs were analyzed for the mRNA expression of the indicated apoptotic genes by RT-qPCR. Relative mRNA expression is shown. **B.** PANC1 (left) or AsPC-1 (Right) cells expressing either *PON2* or NS shRNAs were plated under attached or detached conditions and analyzed for *PUMA* expression by RT-qPCR. Relative *PUMA* mRNA expression is shown. **C.** PANC1 cells expressing indicated shRNAs were analyzed for the expression of *FOXO1*, *FOXO3A* or *FOXO4* by RT-qPCR. Relative mRNA expression in reference to cells expressing NS shRNA is shown. **D.**

PANC1 or AsPC-1 cells expressing either *FOXO1* (left), *FOXO4* (right) or NS shRNA were plated under attached or detached conditions and analyzed for *PUMA* mRNA expression by RT-qPCR. Relative *PUMA* mRNA expression is shown. **E.** AsPC-1 cells expressing *PON2* or NS shRNAs were grown under attached or detached conditions and analyzed for the expression of the indicated proteins by immunoblotting. **F.** Propidium iodide stained PANC1 and AsPC1 cells expressing either a NS shRNA or *PON2* shRNAs were analyzed for cell cycle stages by FACS analysis. % Cell cycle stage is shown. **G.** PANC1 or AsPC1 cells were grown either under attached and detached conditions and <sup>14</sup>C-2DG uptake was measured. Relative <sup>14</sup>C-2DG uptake for PANC1 and AsPC1 under attached or detached conditions is shown. **H.** PANC1 or AsPC1 cells were grown either under attached and detached conditions and ATP/ADP ratio was measured using ADP/ATP Ratio Assay Kit (Sigma). Relative ATP/ADP ratio for PANC1 and AsPC1 under attached or detached conditions is shown. **I.** PANC1 or AsPC1 cell were seeded on poly(HEMA)-coated plates under indicated glucose concentrations. Viable cells were counted after staining with trypan blue, and the relative numbers of viable cells are plotted at indicated time. Data are presented as mean ± SEM, \*p<0.05, \*\*p<0.005.

**Figure S5. Related to Figure 5. Metabolic pathway analysis in PANC1 cells expressing *PON2* or nonspecific shRNA and regulation of GLUT1 activity by *PON2***

**A.** Glucose 6-phosphate/taurine ratio in AsPC-1 cells expressing *PON2* or nonspecific (NS) shRNAs. **B.** Relative <sup>14</sup>C 2DG uptake in AsPC-1 cells expressing *PON2* or NS shRNAs. **C.** Oxygen consumption rate expressed as pmol/minutes in AsPC-1 cells expressing *PON2* or NS shRNAs. **D.** Extracellular acidification rate (ECAR) expressed

as mpH/minutes in AsPC-1 cells expressing *PON2* or NS shRNAs. **E.** Metabolic pathway highlighting key altered metabolites (red) based on metabolite analysis from PANC1 cells expressing *PON2* or NS shRNAs. **F.** Heatmap for key altered metabolites based on metabolite analysis from PANC1 cells expressing *PON2* or NS shRNAs. **G.** The metabolites labeled in red from glycolytic and TCA cycle are presented in PANC1 cells expressing *PON2* or nonspecific (NS) shRNAs that were grown in 10 mM [U-<sup>13</sup>C<sub>6</sub>] glucose and analyzed using CE-TOFMS. The isotope distributions of the metabolites labeled with indicated number of <sup>13</sup>C carbon atoms are shown. **H.** Immunoblot analysis of STOM in cells carrying *STOM* or nonspecific (NS) shRNA in PANC1 (left) and AsPC-1 (right) cells. ACTINB was used as a loading control. **I.** Relative <sup>14</sup>C 2DG uptake in AsPC-1 expressing *STOM* or *PON2* and *STOM* or NS shRNAs. **J.** Immunoblot analysis to measure indicated proteins in AsPC-1 cells expressing NS or *PON2* without or with *STOM* shRNA. Data are presented as mean ± SEM, \*p<0.05, \*\*p<0.005.

**Figure S6. Related to Figures 5 and 6. PON2 regulates GLUT1 mediated glucose uptake.** **A.** PANC1 (left) or AsPC-1 (right) cells expressing either *PON2* or nonspecific (NS) shRNA were analyzed for *HK2*, *GLUT1* and *GLUT3* mRNA expression by RT-qPCR. **B.** PANC1 (left) or AsPC-1 (right) cells expressing either *PON2* or nonspecific (NS) shRNA were analyzed for indicated proteins by immunoblot analysis. **C.** PANC1 cells expressing *PON2* or NS shRNAs were analyzed for cell surface GLUT1 and GLUT3 expression, by extraction of the biotinylated fraction followed by immunoblot analysis. **D.** Co-immunoprecipitation assay in PANC1 cells expressing *PON2* H114Q-GFP or *PON2* H133Q-GFP or *PON2* S331C-GFP using IgG or anti-GFP antibody.

Immunoprecipitates and lysates were analyzed for the indicated proteins. **E.** Relative  $^{14}\text{C}$ -2DG uptake in PANC1 cells co-expressing GLUT1 along with WT PON2-GFP or PON2 H114Q-GFP or PON2 H133Q-GFP or PON2 S331C-GFP. **F.** (Left) Soft agar assay with PANC1 cells expressing either NS or *PON2* shRNAs along with either stable expression of the empty vector control or GLUT1-GFP. (Right) Immunoblotting showing GFP (GLUT1-GFP) expression under indicated condition. ACTINB was measured as a loading control. **G.** Soft agar assay with PANC1 cells expressing NS or *PON2* shRNAs in DMEM with 75mM glucose or DMEM with 75mM glucose and 10 mM 2-Deoxy-D-glucose (2DG). **H.** Co-immunoprecipitation assay in PANC1 cells using IgG or anti-PON2 antibody. Immunoprecipitates and lysates were analyzed for indicated proteins. **I.** PANC1 cells expressing indicated expression constructs were analyzed for  $^{14}\text{C}$ -2DG uptake. Relative  $^{14}\text{C}$ -2DG uptake under indicated condition was analyzed. Data are presented as mean  $\pm$  SEM, \* $p$ <0.05, ns= not significant.

**Figure S7. Related to Figures 6 and 7. *PON2*-loss mediated upregulation of *PUMA* via *FOXO3A* is necessary for tumor growth inhibition.** **A.** PANC1 cells expressing *PON2* or nonspecific (NS) shRNA alone or along with *FOXO3A* and *PUMA* shRNAs were analyzed for anchorage-independent growth in soft agar. Representative images are shown. **B.** PANC1 cells expressing *PON2* or NS shRNA alone or along with *FOXO3A* and *PUMA* shRNAs were analyzed for anchorage-independent growth in soft agar. Representative images are shown. **C.** Tumor lysates corresponding to the figure 6A were analyzed for indicated protein by immunoblot analysis. **D.** Immunoblot analysis of tumor lysates for indicated proteins from mice treated with vehicle or indicated concentrations

of metformin. **E.** Immunoblot analysis of tumor lysates for indicated proteins from mice treated with vehicle or AICAR at a concentration of 500mg/Kg body weight. **F.** Immunoblot analysis of PANC1 cells (Top) or AsPC-1 cells (Bottom) expressing vector control or constitutively active AMPK $\alpha$ 1 (AMPK-CA).

**Table S1. List of 13 metabolic genes shortlisted for functional validation in PDAC cells. Related to Figure 1.**

| <b>Gene Symbol</b> | <b>Gene Name</b>                                                           | <b>Functional Category</b> |
|--------------------|----------------------------------------------------------------------------|----------------------------|
| ACACA              | Acetyl-Coenzyme A Carboxylase Alpha                                        | Fatty acid biosynthesis    |
| CACNB3             | Calcium Channel, Voltage-Dependent, Beta 3 Subunit                         | Calcium ion Transport      |
| ENO2               | Enolase 2 (gamma, neuronal)                                                | Glycolysis                 |
| HK2                | Hexokinase 2                                                               | Glycolysis                 |
| HS2ST1             | Heparan Sulfate 2-O-Sulfotransferase 1                                     | 2-O-Sulfation              |
| LDHA               | Lactate Dehydrogenase A                                                    | Anaerobic Glycolysis       |
| MICAL2             | Microtubule associated monooxygenase, calponin and LIM domain containing 2 | Redox                      |
| OAS2               | 2'-5'-Oligoadenylate Synthetase 2, 69/71kDa                                | Nucleotide Metabolism      |
| PGM2L1             | Phosphoglucomutase 2-like 1                                                | Glycolysis                 |
| PON2               | Paraoxonase 2                                                              | Antioxidant                |
| PPAPDC1A           | Phosphatidic Acid Phosphatase Type 2 Domain Containing 1A                  | Lipid Phosphatase          |
| SDR16C5            | Short-Chain Dehydrogenase/Reductase Family 16C, Member 5                   | Vitamin A metabolism       |
| SLC2A1             | Solute carrier family 2 (facilitated glucose transporter), member 1        | Glucose transport          |

**Table S2: Colony number and relative colony size for indicated soft agar assays. Related to Figures 1, 5, 6, S2, S3 and S6.**

| Figure | Cell Line | Group no | shRNA           | Treatment | Colony no. | SEM   | P value (compared with) | Relative colony size % | SEM  | P value (compared with) |
|--------|-----------|----------|-----------------|-----------|------------|-------|-------------------------|------------------------|------|-------------------------|
| Fig 1B | PANC1     | 1        | NS              |           | 240        | 20.4  |                         | 100.00                 | 5.2  |                         |
|        |           | 2        | PON2#1          |           | 42         | 8.4   | <0.005 (1)              | 17.50                  | 0.6  | <0.005 (1)              |
|        |           | 3        | PON2#2          |           | 54         | 7.2   | <0.005 (1)              | 25.00                  | 1.9  | <0.005 (1)              |
|        | AsPC-1    | 4        | NS              |           | 164        | 11.1  |                         | 100.00                 | 6.5  |                         |
|        |           | 5        | PON2#1          |           | 24         | 2.5   | <0.005 (4)              | 21.30                  | 1    | <0.005 (4)              |
|        |           | 6        | PON2#2          |           | 42         | 3.2   | <0.005 (4)              | 37.80                  | 1.3  | <0.005 (4)              |
|        | SU.86.86  | 7        | NS              |           | 94         | 15.5  |                         | 100.00                 | 5.8  |                         |
|        |           | 8        | PON2#1          |           | 34         | 9.9   | <0.05 (7)               | 13.20                  | 1.8  | <0.005 (7)              |
|        |           | 9        | PON2#2          |           | 48         | 7.7   | <0.05 (7)               | 20.60                  | 3    | <0.005 (7)              |
|        | MiaPaCa2  | 10       | NS              |           | 195        | 18.6  |                         | 100.00                 | 5.9  |                         |
|        |           | 11       | PON2#1          |           | 65         | 8.2   | <0.005 (10)             | 12.30                  | 0.6  | <0.005 (10)             |
|        |           | 12       | PON2#2          |           | 72         | 9.4   | <0.005 (10)             | 19.20                  | 1.4  | <0.005 (10)             |
| Fig 1E | iKRAS     | 1        | iKRAS/Vector    | Dox-      | 0          |       |                         |                        |      |                         |
|        |           | 2        | iKRAS/PON2      | Dox-      | 0          |       |                         |                        |      |                         |
|        |           | 3        | iKRAS/Vector    | Dox+      | 85         | 4.5   |                         | 100.00                 | 8.5  |                         |
|        |           | 4        | iKRAS/PON2      | Dox+      | 92         | 4.9   | 0.3521 (3)              | 280.00                 | 16.1 | <0.005 (3)              |
| Fig 1F | iKRAS     | 1        | Vector KRASG12D |           | 75         | 4.6   |                         | 100.00                 | 7.45 |                         |
|        |           | 2        | PON2 KRASG12D   |           | 78         | 3.8   | 0.6415 (2)              | 350.00                 | 22.5 | <0.005 (2)              |
| Fig 5K | PANC1     | 1        | NS              |           | 280        | 12.6  |                         | 100.00                 | 7.56 |                         |
|        |           | 2        | PON2#1          |           | 68         | 2.85  | <0.005 (1)              | 25.00                  | 2.65 | <0.005 (1)              |
|        |           | 3        | PON2#2          |           | 72         | 3.744 | <0.005 (1)              | 34.38                  | 4.24 | <0.005 (1)              |
|        |           | 4        | NS+STOM         |           | 285        | 13.65 |                         | 112.50                 | 9.65 | ns*                     |
|        |           | 5        | PON2#1+STOM#1   |           | 148        | 5.624 | <0.005 (2)              | 50.00                  | 3.45 | <0.005 (2)              |
|        |           | 6        | PON2#2+STOM#1   |           | 165        | 12.37 | <0.005 (2)              | 53.13                  | 4.56 | <0.05 (2)               |
| Fig 6F | PANC1     | 1        | NS              | 25mM Glu  | 255        | 11.65 |                         | 100.00                 | 6.5  |                         |
|        |           | 2        | PON2#1          | 25mM Glu  | 78         | 5.32  | <0.005 (1)              | 38.89                  | 2.1  | <0.005 (1)              |
|        |           | 3        | PON2#2          | 25mM Glu  | 94         | 6.55  | <0.005 (1)              | 44.44                  | 2.25 | <0.005 (1)              |
|        |           | 4        | PON2#1          | 75mM Glu  | 156        | 8.65  | <0.005 (2)              | 77.78                  | 4.5  | <0.005 (2)              |
|        |           | 5        | PON2#2          | 75mM Glu  | 144        | 7.54  | <0.005 (3)              | 94.44                  | 7.8  | <0.005 (3)              |
| Fig 7B | PANC1     | 1        | PANC1           | UT        | 261        | 14.5  |                         | 100.00                 | 9.5  |                         |
|        |           | 2        | PANC1           | Metformin | 95         | 7.45  | <0.005 (1)              | 31.00                  | 5.1  | <0.005 (1)              |



|         |        |   |        |           |     |       |            |        |      |            |
|---------|--------|---|--------|-----------|-----|-------|------------|--------|------|------------|
|         | AsPC-1 | 1 | AsPC-1 | UT        | 182 | 10.25 |            | 100.00 | 8.4  |            |
|         |        | 2 | AsPC-1 | Metformin | 97  | 5.65  | <0.005 (1) | 40.00  | 4.25 | <0.005 (1) |
| Fig 7D  | PANC1  | 1 | PANC1  | UT        | 221 | 11.5  |            | 100.00 | 7.5  |            |
|         |        | 2 | PANC1  | AICAR     | 74  | 6.45  | <0.005 (1) | 61.00  | 3.5  | <0.05 (1)  |
|         | AsPC-1 | 1 | AsPC-1 | UT        | 165 | 13.65 |            | 100.00 | 8.5  |            |
|         |        | 2 | AsPC-1 | AICAR     | 63  | 3.45  | <0.005 (1) | 55.00  | 2.5  | <0.05 (1)  |
| Fig 7F  | PANC1  | 1 | PANC1  | Vec       | 274 | 12.25 |            | 100.00 | 8.5  |            |
|         |        | 2 | PANC1  | AMPK-CA   | 225 | 9.85  | <0.005 (1) | 71.5   | 4.5  | <0.05 (1)  |
|         | AsPC-1 | 1 | AsPC-1 | Vec       | 195 | 9.5   |            | 100.00 | 9.45 |            |
|         |        | 2 | AsPC-1 | AMPK-CA   | 144 | 7.5   | <0.005 (1) | 74.5   | 5.55 | <0.05 (1)  |
| Fig S2C | iKRAS  | 1 | NS     | Dox-      | 0   |       |            | 0.00   |      |            |
|         |        | 2 | PON2#1 | Dox-      | 0   |       |            | 0.00   |      |            |
|         |        | 3 | PON2#2 | Dox-      | 0   |       |            | 0.00   |      |            |
|         |        | 4 | NS     | Dox+      | 78  | 3.2   |            | 100.00 | 5.45 |            |
|         |        | 5 | PON2#1 | Dox+      | 69  | 4.1   | 0.1586 (4) | 88.88  | 4.15 | ns* (4)    |
|         |        | 6 | PON2#2 | Dox+      | 75  | 3.5   | 0.5614 (4) | 111.11 | 6.25 | ns* (4)    |
| Fig S2D | HPNE   | 1 | NS     | Vector    | 0   |       |            | 0      |      |            |
|         |        | 2 | PON2#1 | Vector    | 0   |       |            | 0      |      |            |
|         |        | 3 | PON2#2 | Vector    | 0   |       |            | 0      |      |            |
|         |        | 4 | NS     | KRASG12D  | 85  | 3.5   |            | 100    | 4.55 |            |
|         |        | 5 | PON2#1 | KRASG12D  | 78  | 4.2   | 0.2363 (4) | 95.4   | 5.2  | ns* (4)    |
|         |        | 6 | PON2#2 | KRASG12D  | 81  | 4.1   | 0.4793 (4) | 98.33  | 6.5  | ns* (4)    |
| Fig S3C | PANC1  | 1 | NS     | DMSO      | 197 | 11.35 |            | 100.00 | 7.8  |            |
|         |        | 2 | PON2#1 | DMSO      | 54  | 5.2   | <0.005 (1) | 15.30  | 1.8  | <0.005 (1) |
|         |        | 3 | PON2#2 | DMSO      | 65  | 4.2   | <0.005 (1) | 18.50  | 2.45 | <0.005 (1) |
|         |        | 4 | NS     | Z-VAD-FMK | 221 | 16.5  |            | 124.00 | 9.55 |            |
|         |        | 5 | PON2#1 | Z-VAD-FMK | 121 | 9.3   | <0.005 (2) | 78.40  | 6.2  | <0.005 (2) |
|         |        | 6 | PON2#2 | Z-VAD-FMK | 183 | 8.2   | <0.005 (3) | 76.55  | 5.9  | <0.005 (3) |
| Fig S6F | PANC1  | 1 | NS     | Vector    | 235 | 16.54 |            | 100.00 | 7.2  |            |
|         |        | 2 | PON2#1 | Vector    | 67  | 4.5   | <0.005 (1) | 35.71  | 2.89 | <0.005 (1) |

|         |        |    |        |              |     |       |            |        |      |            |
|---------|--------|----|--------|--------------|-----|-------|------------|--------|------|------------|
|         |        | 3  | PON2#2 | Vector       | 72  | 5.6   | <0.005 (1) | 28.57  | 2.45 | <0.005 (1) |
|         |        | 4  | NS     | GLUT1        | 256 | 15.25 |            | 107.14 | 6.5  |            |
|         |        | 5  | PON2#1 | GLUT1        | 176 | 11.25 | <0.005 (2) | 71.42  | 5.1  | <0.005 (2) |
|         |        | 6  | PON2#2 | GLUT1        | 183 | 10.85 | <0.005 (3) | 78.57  | 4.3  | <0.005 (3) |
|         |        |    |        |              |     |       |            |        |      |            |
|         |        |    |        |              |     |       |            |        |      |            |
| FigS6G  | PANC1  | 1  | NS     | High Glu     | 225 | 14.5  |            | 100.00 | 7.45 |            |
|         |        | 2  | PON2#1 | High Glu     | 155 | 10.55 |            | 64.29  | 5.5  |            |
|         |        | 3  | PON2#2 | High Glu     | 168 | 9.58  |            | 71.43  | 4.55 |            |
|         |        | 4  | NS     | High Glu+2DG | 100 | 6.5   | <0.005 (1) | 46.43  | 3.68 | <0.005 (1) |
|         |        | 5  | PON2#1 | High Glu+2DG | 35  | 2.65  | <0.005 (2) | 25.00  | 2.95 | <0.005 (2) |
|         |        | 6  | PON2#2 | High Glu+2DG | 38  | 3.2   | <0.005 (3) | 17.86  | 2.4  | <0.005 (3) |
|         |        |    |        |              |     |       |            |        |      |            |
|         |        |    |        |              |     |       |            |        |      |            |
| Fig S7A | PANC1  | 1  | NS     |              | 215 | 15.4  |            | 100.00 | 8.5  |            |
|         |        | 2  | PON2#1 |              | 53  | 3.5   | <0.005 (1) | 25.50  | 2.3  | <0.005 (1) |
|         |        | 3  | PON2#2 |              | 69  | 4.5   | <0.005 (1) | 35.00  | 3.4  | <0.005 (1) |
|         |        | 4  | PON2#1 | FOXO3A#1     | 175 | 7.8   | <0.005 (2) | 95.70  | 9.5  | <0.005 (2) |
|         |        | 5  | PON2#2 | FOXO3A#1     | 145 | 8.9   | <0.005 (3) | 92.85  | 8.2  | <0.005 (3) |
|         |        | 6  | PON2#1 | FOXO3A#2     | 163 | 5.9   | <0.005 (2) | 60.71  | 6.5  | <0.05 (2)  |
|         |        | 7  | PON2#2 | FOXO3A#2     | 149 | 8.2   | <0.005 (3) | 75.00  | 7.15 | <0.05 (3)  |
|         |        | 8  | PON2#1 | PUMA#1       | 109 | 6.3   | <0.005 (2) | 38.55  | 4.3  | ns* (2)    |
|         |        | 9  | PON2#2 | PUMA#1       | 91  | 4.5   | <0.05 (3)  | 35.71  | 4.1  | ns* (3)    |
|         |        | 10 | PON2#1 | PUMA#2       | 84  | 4.9   | <0.05 (2)  | 39.28  | 3.33 | <0.05 (2)  |
|         |        | 11 | PON2#2 | PUMA#2       | 117 | 7.2   | <0.005 (3) | 42.85  | 2.89 | ns* (3)    |
|         |        |    |        |              |     |       |            |        |      |            |
|         |        |    |        |              |     |       |            |        |      |            |
| Fig S7B | AsPC-1 | 1  | NS     |              | 173 | 11.26 |            | 100.00 | 7.5  |            |
|         |        | 2  | PON2#1 |              | 49  | 3.79  | <0.005 (1) | 30.55  | 4.3  | <0.005 (1) |
|         |        | 3  | PON2#2 |              | 63  | 5.64  | <0.005 (1) | 33.33  | 3.35 | <0.005 (1) |
|         |        | 4  | PON2#1 | FOXO3A#1     | 142 | 14.5  | <0.005 (2) | 63.33  | 7.5  | <0.05 (2)  |
|         |        | 5  | PON2#2 | FOXO3A#1     | 132 | 10.25 | <0.005 (3) | 60.55  | 6.5  | <0.05 (3)  |
|         |        | 6  | PON2#1 | FOXO3A#2     | 133 | 11.36 | <0.005 (2) | 65.75  | 6.5  | <0.05 (2)  |
|         |        | 7  | PON2#2 | FOXO3A#2     | 121 | 9.8   | <0.05 (3)  | 58.50  | 4.56 | <0.05 (3)  |
|         |        | 8  | PON2#1 | PUMA#1       | 91  | 6.3   | <0.05 (2)  | 43.35  | 3.85 | 0.0908 (2) |
|         |        | 9  | PON2#2 | PUMA#1       | 83  | 5.5   | 0.0641 (3) | 62.55  | 5.55 | <0.05 (3)  |
|         |        | 10 | PON2#1 | PUMA#2       | 65  | 7.2   | 0.1207 (2) | 55.65  | 3.25 | <0.05 (2)  |
|         |        | 11 | PON2#2 | PUMA#2       | 55  | 3.45  | 0.2929 (3) | 46.66  | 3.15 | <0.05 (3)  |

ns\*- Not Significant (P value > 0.05)

**Table S3: Quantitation for bioluminescent imaging of tumors and metastasis. Related to Figures 1, 2, 6, 7, S1 and S3.**

| Figure | Group no | Cell line | shRNA             | Comment | Weeks post injection | Average Total counts | SEM        | P value (Group compared to) |
|--------|----------|-----------|-------------------|---------|----------------------|----------------------|------------|-----------------------------|
| Fig 1D | 1        | PANC1     | NS                |         | Week 1               | 3808400.00           | 1324740.37 |                             |
|        | 2        | PANC1     | PON2#1            |         | Week 1               | 44926.67             | 32638.40   | <0.05 (1)                   |
|        | 3        | PANC1     | PON2#2            |         | Week 1               | 67110.00             | 50905.34   | <0.05 (1)                   |
|        | 4        | PANC1     | NS                |         | Week 4               | 8173000.00           | 2656962.87 |                             |
|        | 5        | PANC1     | PON2#1            |         | Week 4               | 14903.00             | 4892.25    | <0.05 (4)                   |
|        | 6        | PANC1     | PON2#2            |         | Week 4               | 100536.67            | 78690.47   | <0.05 (4)                   |
| Fig 2D | 1        | PANC1     | NS                |         | Week 1               | 55613.33             | 8978.62    |                             |
|        | 2        | PANC1     | PON2#1            |         | Week 1               | 16990.00             | 3054.83    | <0.05 (1)                   |
|        | 3        | PANC1     | PON2#2            |         | Week 1               | 10836.67             | 142.10     | <0.05 (1)                   |
|        | 4        | PANC1     | NS                |         | Week 4               | 180733.33            | 41737.52   |                             |
|        | 5        | PANC1     | PON2#1            |         | Week 4               | 49070.00             | 7735.93    | <0.05 (4)                   |
|        | 6        | PANC1     | PON2#2            |         | Week 4               | 9491.67              | 524.74     | <0.05 (4)                   |
| Fig 2E | 1        | PANC1     | NS                | Liver   |                      | 1920333.33           | 314849.25  |                             |
|        | 2        | PANC1     | PON2#1            | Liver   |                      | 5620.00              | 2212.86    | <0.005 (1)                  |
|        | 3        | PANC1     | PON2#2            | Liver   |                      | 333716.67            | 311557.34  | <0.05 (1)                   |
| Fig 2F | 1        | PANC1     | NS                | Lung    |                      | 898533.33            | 199600.47  |                             |
|        | 2        | PANC1     | PON2#1            | Lung    |                      | 5945.67              | 1674.12    | <0.05 (1)                   |
|        | 3        | PANC1     | PON2#2            | Lung    |                      | 23076.67             | 5332.02    | <0.05 (1)                   |
|        | 4        | PANC1     | NS                | Liver   |                      | 10694000.00          | 3731717.82 |                             |
|        | 5        | PANC1     | PON2#1            | Liver   |                      | 4734.33              | 573.77     | <0.05 (4)                   |
|        | 6        | PANC1     | PON2#2            | Liver   |                      | 291296.67            | 254472.71  | <0.05 (4)                   |
| Fig 6D | 1        | PANC1     | NS                |         | Week 1               | 834733.33            | 55632.93   |                             |
|        | 2        | PANC1     | PON2#1            |         | Week 1               | 128300.00            | 21216.63   | <0.005 (1)                  |
|        | 3        | PANC1     | PON2#1 + FOXO3A#1 |         | Week 1               | 916500.00            | 267630.53  | <0.05 (2)                   |
|        | 4        | PANC1     | PON2#1 + FOXO3A#2 |         | Week 1               | 873266.67            | 139013.45  | <0.05 (2)                   |
|        | 5        | PANC1     | PON2#1 + PUMA#1   |         | Week 1               | 332700.00            | 90399.28   | ns* (2)                     |
|        | 6        | PANC1     | PON2#1 + PUMA#2   |         | Week 1               | 529666.67            | 129426.10  | <0.05 (2)                   |
|        | 7        | PANC1     | NS                |         | Week 4               | 6988000.00           | 1534048.18 |                             |
|        | 8        | PANC1     | PON2#1            |         | Week 4               | 421666.67            | 112801.43  | <0.05 (7)                   |
|        | 9        | PANC1     | PON2#1 + FOXO3A#1 |         | Week 4               | 7235666.67           | 2236128.97 | <0.05 (8)                   |

|         |    |        |                   |       |        |             |            |            |
|---------|----|--------|-------------------|-------|--------|-------------|------------|------------|
|         | 10 | PANC1  | PON2#1 + FOXO3A#2 |       | Week 4 | 10263000.00 | 432753.45  | <0.005 (8) |
|         | 11 | PANC1  | PON2#1 + PUMA#1   |       | Week 4 | 1390033.33  | 275733.15  | <0.05 (8)  |
|         | 12 | PANC1  | PON2#1 + PUMA#2   |       | Week 4 | 1308433.33  | 257991.50  | <0.05 (8)  |
|         |    |        |                   |       |        |             |            |            |
| Fig 7A  | 1  | PANC1  | NS                |       | Week 1 | 759133.33   | 236900.28  |            |
|         | 2  | PANC1  | NS                | +Dox  | Week 1 | 970700.00   | 392162.36  | ns* (1)    |
|         | 3  | PANC1  | PON2#1            |       | Week 1 | 895300.00   | 333745.62  |            |
|         | 4  | PANC1  | PON2#1            | +Dox  | Week 1 | 1264133.33  | 214037.32  | ns* (3)    |
|         | 5  | PANC1  | PON2#2            |       | Week 1 | 949200.00   | 163373.34  |            |
|         | 6  | PANC1  | PON2#2            | +Dox  | Week 1 | 1561966.67  | 382986.04  | ns* (5)    |
|         | 7  | PANC1  | NS                |       | Week 4 | 17443333.33 | 2809571.65 |            |
|         | 8  | PANC1  | NS                | +Dox  | Week 4 | 14679000.00 | 4802145.47 | ns* (7)    |
|         | 9  | PANC1  | PON2#1            |       | Week 4 | 12171000.00 | 1998634.05 |            |
|         | 10 | PANC1  | PON2#1            | +Dox  | Week 4 | 998966.67   | 223206.81  | <0.05 (9)  |
|         | 11 | PANC1  | PON2#2            |       | Week 4 | 6255666.67  | 1037122.50 |            |
|         | 12 | PANC1  | PON2#2            | +Dox  | Week 4 | 896066.67   | 282892.33  | <0.05 (11) |
|         |    |        |                   |       |        |             |            |            |
| Fig S1F | 1  | AsPC-1 | NS                |       | Week 1 | 5765666.67  | 401158.29  |            |
|         | 2  | AsPC-1 | PON2#1            |       | Week 1 | 25246.67    | 12431.09   | <0.005 (1) |
|         | 3  | AsPC-1 | PON2#2            |       | Week 1 | 305666.67   | 14167.90   | <0.005 (1) |
|         | 4  | AsPC-1 | NS                |       | Week 4 | 36556666.67 | 6100559.34 |            |
|         | 5  | AsPC-1 | PON2#1            |       | Week 4 | 221010.67   | 201360.63  | <0.005 (4) |
|         | 6  | AsPC-1 | PON2#2            |       | Week 4 | 305666.67   | 14167.90   | <0.005 (4) |
|         |    |        |                   |       |        |             |            |            |
| Fig S3E | 1  | AsPC-1 | NS                |       | Week 1 | 1755533.33  | 637021.14  |            |
|         | 2  | AsPC-1 | PON2#1            |       | Week 1 | 469876.67   | 278055.01  | ns* (1)    |
|         | 3  | AsPC-1 | PON2#2            |       | Week 1 | 776533.33   | 482454.07  | ns* (1)    |
|         | 4  | AsPC-1 | NS                |       | Week 4 | 14186666.67 | 2662207.95 |            |
|         | 5  | AsPC-1 | PON2#1            |       | Week 4 | 630333.33   | 413590.70  | <0.05 (4)  |
|         | 6  | AsPC-1 | PON2#2            |       | Week 4 | 1427533.33  | 847301.40  | <0.05 (4)  |
|         |    |        |                   |       |        |             |            |            |
| Fig S3F | 1  | AsPC-1 | NS                | Lung  |        | 508033.33   | 15462.44   |            |
|         | 2  | AsPC-1 | PON2#1            | Lung  |        | 4832.67     | 586.96     | <0.005 (1) |
|         | 3  | AsPC-1 | PON2#2            | Lung  |        | 5019.00     | 495.80     | <0.005 (1) |
|         | 4  | AsPC-1 | NS                | Liver |        | 14243000.00 | 4747522.99 |            |
|         | 5  | AsPC-1 | PON2#1            | Liver |        | 4765.00     | 513.59     | <0.05 (4)  |
|         | 6  | AsPC-1 | PON2#2            | Liver |        | 15228.00    | 7665.27    | <0.05 (4)  |

ns\*- Not Significant (P value > 0.05)

**Table S4. Summary of immunohistochemistry staining for PON2 in human pancreata and PDAC samples. Related to Figure 3.**

| Staining                                | Cytoplasmic/membranous |        |              |      |             |      |  |
|-----------------------------------------|------------------------|--------|--------------|------|-------------|------|--|
|                                         | Density                | 0      | 1+           | 2+   |             |      |  |
| Percentile                              | <10%                   | 11-25% | 26-50%       | >50% |             |      |  |
| <b>Non-neoplastic pancreatic tissue</b> |                        |        |              |      |             |      |  |
|                                         | Ductal Cells           |        | Acinar Cells |      | Islet Cells |      |  |
| 4916N                                   |                        |        | 2+           | 100% |             |      |  |
| 4417N                                   | 1+                     | 5%     | 1+           | 20%  | 1+          | 100% |  |
| 4234N                                   | 1+                     | 5%     | 2+           | 20%  |             |      |  |
| 6492N                                   | 0                      | 0      | 1+           | 30%  |             |      |  |
| 2820N                                   | 1+                     | 20%    | 1+           | 80%  | 2+          | 100% |  |
| <b>Pancreatic ductal adenocarcinoma</b> |                        |        |              |      |             |      |  |
| 7266T                                   | 2+                     | 80%    |              |      |             |      |  |
| 7261T                                   | 2+                     | 90%    |              |      |             |      |  |
| 7273T                                   | 2+                     | 90%    |              |      |             |      |  |
| 7267T                                   | 2+                     | 30%    | 3+           | 10%  |             |      |  |
| 7265T                                   | 2+                     | 60%    |              |      |             |      |  |
| 7271T                                   | 2+                     | 40%    |              |      |             |      |  |
| 7274T                                   | 2+                     | 60%    | 3+           | 40%  |             |      |  |
| 7275T                                   | 2+                     | 80%    |              |      |             |      |  |
| 7277T                                   | 2+                     | 60%    |              |      |             |      |  |
| 7262T                                   | 2+                     | 50%    | 3+           | 50%  |             |      |  |

**Table S5. List of RT-qPCR primers of apoptotic genes. Related to Figure S4.**

| <b>Gene symbol</b>     | <b>Species</b> | <b>Forward primer (5'-3')</b> | <b>Reverse primer (5'-3')</b> |
|------------------------|----------------|-------------------------------|-------------------------------|
| BAD                    | <i>Human</i>   | CTGGACGCGAGTCTCCAGT           | AGTGGGAACGGGTGGAGTTT          |
| BAK1                   | <i>Human</i>   | GCTACCGTCTGGCCCTACAC          | CAGAACCACACCCAGAACCA          |
| BAX                    | <i>Human</i>   | CAGCAAACCTGGTGCTCAAGG         | CAACCACCCTGGTCTTGGAT          |
| BID                    | <i>Human</i>   | TCCCCGTTGGGAAGAATAGA          | TGTGACTGGCCACCTTCTTG          |
| BIK                    | <i>Human</i>   | GACCTGGACCCTATGGAGGA          | TGGTGAAACCGTCCATGAAA          |
| BOK                    | <i>Human</i>   | CCACAGACAAGGAGCTGGTG          | CAGACTGCAGGGAGATGTGC          |
| BMF                    | <i>Human</i>   | TATGGCAATGCTGGCTATCG          | CTGGTGTGCTGCACATGAA           |
| BCL-W/BCL2L2           | <i>Human</i>   | ACAACGCTTCACCCAGGTCT          | CCACTGCTGTGGATCCAGTC          |
| BCL-XL/BCL2L1          | <i>Human</i>   | TGACATCCCAGCTCCACATC          | AGAGTGAGCCCAGCAGAACC          |
| DIVA/BCL2L10/<br>BCL-B | <i>Human</i>   | GCCGACTACCTGGGGTACTG          | ACCGGTGAATCTGCCGTAAC          |
| BIM/BCL2L11            | <i>Human</i>   | ATGCGCCCAGAGATATGGAT          | ACCATTTCGTGGGTGGTCTTC         |
| BCL2A1                 | <i>Human</i>   | TGGATCAGGTCCAAGCAAAA          | GGGGCAATTTGCTGTCGTAG          |
| BCL-2                  | <i>Human</i>   | CATGTGTGTGGAGAGCGTCA          | ATCCCAGCCTCCGTTATCCT          |
| BNIP1                  | <i>Human</i>   | GGTGAAGGCGCTTATTCAGG          | CATGAGGCCTGATTGCTGAG          |
| BNIP3                  | <i>Human</i>   | TCACTGTGACAGCCCACCTC          | TTCATGACGCTCGTGTTCCT          |
| CD27                   | <i>Human</i>   | CTTCCAAACCCTTCGCTGAC          | GGTGGCCAGTGGGTAGAGAG          |
| CFLAR                  | <i>Human</i>   | TTCTTGCCAATTTGCCTGT           | CCTCGTTCTGAGCCTTGAA           |
| FAS                    | <i>Human</i>   | CCCTGTCTCCAGGTGAAAG           | TCCGGGTGCAGTTTATTTCC          |
| HRK                    | <i>Human</i>   | CTAGGCGACGAGCTGCAC            | CACAGCCAAGGCCAGTAGGT          |
| NOXA                   | <i>Human</i>   | AAGAAGGCGCGCAAGAAC            | TCTGCCGGAAGTTCAGTTTG          |
| PYCARD                 | <i>Human</i>   | GGATGCTCTGTACGGGAAGG          | GTCCTTGCAGGTCCAGTTCC          |
| TNFSF10                | <i>Human</i>   | CCAACGAGCTGAAGCAGATG          | CGGAGTTGCCACTTGACTTG          |
| TP53BP2                | <i>Human</i>   | AAGAATTCCTCGGCCACTCA          | TGGATGGGTATGATGGGACA          |
| TRADD                  | <i>Human</i>   | CGCTCTGTGGGTCTCAAATG          | AGCTCGTTCTCCTCGAGTGC          |
| TRAF3                  | <i>Human</i>   | ACCGCCAGCTACAATGGAGT          | GCTGGCTGTAAAGGGACAGG          |



|  |  |  |  |  |  |  |  |
|--|--|--|--|--|--|--|--|
|  |  |  |  |  |  |  |  |
|--|--|--|--|--|--|--|--|



**Table S7. Primers were used for qRT-PCR analysis, ChIP experiments, and cloning. The antibodies were used as indicated. The source and concentrations of chemical inhibitors and biologics used for drug treatment experiments are summarized. Related to STAR methods**

| <b>PRIMERS</b>            |                |                                             |                                       |
|---------------------------|----------------|---------------------------------------------|---------------------------------------|
| <b>Gene symbol</b>        | <b>Species</b> | <b>Forward primer (5'-3')</b>               | <b>Reverse primer (5'-3')</b>         |
| ACACA                     | Human          | GCTGGGACAGAGAACCATCC                        | AGCCAGTGCAGGACAGTGAA                  |
| CACNB3                    | Human          | CCCCATCATCGTCTTTGTCA                        | CCTCCAGCTGGTTCTCATCC                  |
| ENO2                      | Human          | AGCTGAGAGCTTTCGGGATG                        | CCTTGTTCGATGGCTTCCTTC                 |
| HK2                       | Human          | AGCTGCTGGAGGTCAAGAGG                        | CAAGGTCCAAGCCAAGAAG                   |
| HS2ST1                    | Human          | GTCCCCTCGAAGCTAGAAA                         | CTTGCCGTTTTGGGAACTCT                  |
| LDHA                      | Human          | TGGCCTGTGCCATCAGTATC                        | TTCCAAGCCACGTAGGTCAA                  |
| MICAL2                    | Human          | TCACCTTGCCTCCATGTTTG                        | TCCTTTCTGGCAGGAGAAGC                  |
| OAS2                      | Human          | CCGATGGTACCCTTGTCTC                         | TGGATGGTGAACCCATCAAG                  |
| PGM2L1                    | Human          | GTGTGGAACCCTGGAATGGT                        | ATGTCCGACCCCATGAAAAG                  |
| PON2                      | Human          | AATCCACATGGCATCAGCAC                        | CGGTCCAACAGCTGTGATGT                  |
| PPAPDC1A                  | Human          | TATCCGGCGAACAGACAAGA                        | GCAATGCATTTCCGAGTTCA                  |
| SDR16C5                   | Human          | CTGGAAGTGGACTCGGAAGG                        | CCTTCCTTTTGGCTGCAATC                  |
| SLC2A1                    | Human          | GATGATGCGGGAGAAGAAGG                        | GCCTTCTCGAAGATGCTCGT                  |
| STOM                      | Human          | CCTGGCTGTGGCAAATATCA                        | CCTTTATTCCCAGGCATCA                   |
| SDR16C5                   | Mouse          | AAGAACGTTGCCGGTGAGAT                        | ACTCTGGCAGCTCCTGCTTC                  |
| ENO2                      | Mouse          | GGAACCTCCGACCTCATCCTG                       | TGGCATCCTTGCATACTTG                   |
| HK2                       | Mouse          | CGAGGGTGAAGATGTGGTCA                        | TTCCAGTGCCAACAATGAGG                  |
| LDHA                      | Mouse          | GTGCCTGTGTGGAGTGGTGT                        | ATGGCCCAGGATGTGTAACC                  |
| SLC2A1                    | Mouse          | GATGATGCGGGAGAAGAAGG                        | GCCTTCTCGAAGATGCTCGT                  |
| ACACA                     | Mouse          | GGGGTCATGCCTCTGAGAAC                        | CCACTCCAGGGGAAGAGTTGG                 |
| CACNB3                    | Mouse          | CGCTCTGTGCTCAACAATCC                        | AGACGATGATGGGAGCCAGT                  |
| PGM2L1                    | Mouse          | TGCTGGAAGTGTCCCTGAGA                        | ATCCACCACCCAAACAAAGC                  |
| <b>Cloning</b>            |                |                                             |                                       |
| PON2                      | pBabe Hygro    | CGCGGATCCCCATGGGGCGGCTGG<br>TGGCTGTGGGC     | GCGTCGACGAGTTCACAATACAA<br>GGCTCTGTG  |
| PON2                      | pEGFP-C1       | ACCCAAGCTTCGACCATGGGGCGG<br>CTGGTGGCTGTGGGC | GCGCGATCCGAGTTCACAATACA<br>AGGCTCTGTG |
| PON2 promoter             | pGL4.14        | AGCCTCGAGACAGGCTCACCCTG<br>CCAGAA           | AGTCAGATCTGGCGGGGAGCCG<br>GGCGC       |
| PUMA promoter             | pGL4.14        | AGCCTCGAGGGCAGATCACGAGGT<br>CAGGA           | AGTCAGATCTACCCAGGCGAGAC<br>ACCTGCA    |
| <b>CHIP</b>               |                |                                             |                                       |
| PON2 promoter p53 binding |                | TTAATAGAGGCTGGGCATGG                        | GCTCACTGCAGTCTGGACCT                  |
| PUMA                      |                | AGGAGGTGACAGGAGTGCAG                        | CGCACCCATTGTTTGTA                     |
| Actin                     |                | GAGGGGAGAGGGGGTAAAAA                        | AAAGGCGAGGCTCTGTGCT                   |

|                               |                    |                                          |                                          |
|-------------------------------|--------------------|------------------------------------------|------------------------------------------|
|                               |                    |                                          |                                          |
| <b>Site directed mutation</b> |                    |                                          |                                          |
| PON2 promoter                 |                    | TTAATAGAGGCTGGGTATAGTGGC<br>TCATTCTGTGA  | TACAGGAATGAGCCACTATACCC<br>AGCCTCTATTAA  |
| PUMA promoter                 |                    | GGCGGGTTTGTTTACAGGGAATGG<br>GGTGCGGGCTCG | CGAGCCCGCACCCCATTCCCTGTA<br>AACAAACCCGCC |
| <b>CTC primers</b>            |                    |                                          |                                          |
| Human Alu                     |                    | ACGCCTGTAATCCCAGCACTT                    | TCGCCAGGCTGGAGTGC                        |
| Actin mouse                   |                    | GCTTCTTTGCAGCTCCTTCGTTG                  | TTTGCACATGCCGGAGCCGTTGT                  |
|                               |                    |                                          |                                          |
| <b>RNAi (shRNAs)</b>          | <b>Gene symbol</b> | <b>Clone ID</b>                          | <b>Vector</b>                            |
| #1                            | ACACA              | TRCN0000029024                           | pLKO.1                                   |
| #2                            | ACACA              | TRCN0000004767                           | pLKO.1                                   |
| #1                            | CACNB3             | TRCN0000044066                           | pLKO.1                                   |
| #2                            | CACNB3             | TRCN0000044065                           | pLKO.1                                   |
| #1                            | ENO2               | TRCN0000156035                           | pLKO.1                                   |
| #2                            | ENO2               | TRCN0000158245                           | pLKO.1                                   |
| #1                            | HK2                | TRCN0000037672                           | pLKO.1                                   |
| #2                            | HK2                | TRCN0000037673                           | pLKO.1                                   |
| #1                            | LDHA               | TRCN0000026541                           | pLKO.1                                   |
| #2                            | LDHA               | TRCN0000026554                           | pLKO.1                                   |
| #1                            | PGM2L1             | TRCN0000049088                           | pLKO.1                                   |
| #2                            | PGM2L1             | TRCN0000049091                           | pLKO.1                                   |
| #1                            | PON2               | TRCN0000051644                           | pLKO.1                                   |
| #2                            | PON2               | TRCN0000051647                           | pLKO.1                                   |
| #1                            | PON2               | V2LHS_92265                              | pGIPZ                                    |
| #2                            | PON2               | V2LHS_232087                             | pGIPZ                                    |
| #1                            | SDR16C5            | TRCN0000028583                           | pLKO.1                                   |
| #2                            | SDR16C5            | TRCN0000028656                           | pLKO.1                                   |
| #1                            | SLC2A1             | TRCN0000043583                           | pLKO.1                                   |
| #2                            | SLC2A1             | TRCN0000043587                           | pLKO.1                                   |
| #1                            | PUMA               | V3LHS_342436                             | pGIPZ                                    |
| #2                            | PUMA               | V3LHS_342433                             | pGIPZ                                    |
| #1                            | FOXO1              | TRCN0000039578                           | pLKO.1                                   |
| #2                            | FOXO1              | TRCN0000020707                           | pLKO.1                                   |
| #1                            | FOXO3              | TRCN0000010334                           | pLKO.1                                   |
| #2                            | FOXO3              | TRCN0000010335                           | pLKO.1                                   |
| #1                            | FOXO4              | TRCN0000039718                           | pLKO.1                                   |
| #2                            | FOXO4              | TRCN0000039721                           | pLKO.1                                   |

|    |                     |                            |                                             |
|----|---------------------|----------------------------|---------------------------------------------|
| #1 | STOM                | TRCN0000029160             | pLKO.1                                      |
| #2 | STOM                | TRCN0000029161             | pLKO.1                                      |
|    |                     |                            |                                             |
|    |                     | <b>Protein symbol</b>      | <b>Antibody source</b>                      |
|    |                     |                            | <b>Dilution</b>                             |
|    | Immunoblot          |                            |                                             |
|    | /CHIP               | P53                        | Santa Cruz Biotechnology #sc-126            |
|    | /IHC                | PON2                       | Santa Cruz Biotechnology #sc-374158         |
|    | /CHIP               | FOXO3A                     | Cell Signaling #2497                        |
|    |                     | $\beta$ -actin             | Cell signaling #4970                        |
|    |                     | Phospho-FOXO3A             | Cell Signaling #8174                        |
|    |                     | Phospho-AMPK               | Cell Signaling #2535                        |
|    |                     | AMPK                       | Cell Signaling #2532                        |
|    |                     | PARP                       | Cell Signaling #9542                        |
|    |                     | PUMA                       | Cell Signaling #4976                        |
|    |                     | GLUT1                      | Cell Signaling #12939                       |
|    |                     | GLUT1                      | Santa Cruz Biotechnology Sc-7903, sc-377228 |
|    |                     | GLUT3                      | Santa Cruz Biotechnology Sc-74497           |
|    |                     | STOM                       | Bethyl Laboratories A304-425A               |
|    |                     |                            |                                             |
|    |                     | <b>Inhibitor</b>           | <b>Source</b>                               |
|    | Chemical inhibition |                            |                                             |
|    |                     | AMPK inhibitor, Compound C | Calbiochem # 171261                         |
|    |                     | Metformin                  | Sigma #D150959                              |
|    |                     | AICAR                      | Cayman Chemicals #CAS 2627-69-2             |
|    |                     | Trametinib                 | Selleckchem #S2673                          |
|    |                     | Z-VAD-FMK                  | Calbiochem #CAS 187389-52-2                 |
